# Supplementary material for: Aberrant DNA methylation results in altered gene expression in non-alcoholic steatohepatitis-related hepatocellular carcinomas
Source: PubMed Central journal article supplement (PMC7467955; doi:10.1007/s00432-020-03298-4), 2020-07-19
Supplement: 432_2020_3298_MOESM1_ESM.pdf [file 432_2020_3298_MOESM1_ESM.pdf]

**Supplementary Table S1** Clinicopathological characteristics of patients with hepatocellular carcinoma (HCC)

**(A) Non-alcoholic steatohepatitis-related HCCs**

| Clinicopathological parameters                               |            | Number of patients (n=22) |
|--------------------------------------------------------------|------------|---------------------------|
| Age (years)                                                  |            | 71.2 ± 7.65               |
| Sex                                                          | Male       | 20                        |
|                                                              | Female     | 2                         |
| <b>Histological findings in non-cancerous liver tissue</b>   |            |                           |
| Steatosis (%) <sup>a</sup>                                   | 5-33       | 15                        |
|                                                              | 33-66      | 6                         |
|                                                              | > 66       | 1                         |
| Lobular inflammation (foci/field) <sup>a</sup>               | < 2        | 17                        |
|                                                              | 2-4        | 5                         |
| Ballooning <sup>a</sup>                                      | Few        | 19                        |
|                                                              | Many       | 3                         |
| Nonalcoholic fatty liver disease activity score <sup>a</sup> | 3          | 13                        |
|                                                              | 4          | 5                         |
|                                                              | 5          | 2                         |
|                                                              | 6          | 1                         |
|                                                              | 7          | 1                         |
| Necroinflammatory grading <sup>b</sup>                       | Mild       | 16                        |
|                                                              | Moderate   | 4                         |
|                                                              | Severe     | 2                         |
| Brunt stage <sup>c</sup>                                     | 1          | 5                         |
|                                                              | 2          | 10                        |
|                                                              | 3          | 5                         |
|                                                              | 4          | 2                         |
| <b>Characteristics of HCCs</b>                               |            |                           |
| Differentiation <sup>d</sup>                                 | Well       | 4                         |
|                                                              | Moderately | 13                        |
|                                                              | Poorly     | 5                         |
| Portal vein invasion                                         | Negative   | 10                        |
|                                                              | Positive   | 12                        |
| Pathological Tumor-Node-Metastasis stage <sup>e</sup>        | IA         | 1                         |
|                                                              | IB         | 7                         |
|                                                              | II         | 12                        |
|                                                              | IIIA       | 1                         |
|                                                              | IIIB       | 1                         |

**(B) Viral hepatitis-related HCCs**

| Clinicopathological parameters                        |            | Number of patients (n=36) |
|-------------------------------------------------------|------------|---------------------------|
| Age (years)                                           |            | 60.4 ± 10.6               |
| Sex                                                   | Male       | 31                        |
|                                                       | Female     | 5                         |
| Hepatitis virus                                       | B          | 13                        |
|                                                       | C          | 22                        |
|                                                       | B and C    | 1                         |
| <b>Characteristics of HCCs</b>                        |            |                           |
| Differentiation <sup>d</sup>                          | Well       | 8                         |
|                                                       | Moderately | 16                        |
|                                                       | Poorly     | 12                        |
| Portal vein invasion                                  | Negative   | 16                        |
|                                                       | Positive   | 20                        |
| Pathological Tumor-Node-Metastasis stage <sup>e</sup> | IA         | 0                         |
|                                                       | IB         | 11                        |
|                                                       | II         | 24                        |
|                                                       | IIIA       | 1                         |
|                                                       | IIIB       | 0                         |

<sup>a</sup>According to Kleiner et al (2005). <sup>b</sup>According to the Brunt classification (1999). <sup>c</sup>Used for assessment of hepatic fibrosis (Brunt et al. 1999). <sup>d</sup>In accordance with the World Health Organization classification (Hirohashi et al. 2000). <sup>e</sup>In accordance with the Union for International Cancer Control (UICC) classification (Brierley et al. 2017).

**Supplementary Table S2** List of primers used for quantitative reverse transcription-PCR reaction

| Gene             | Primer  | Sequence                     |
|------------------|---------|------------------------------|
| <i>GAPDH</i>     | Forward | 5'tgtggcaaggtcatccct3'       |
|                  | Reverse | 5'gccctccgacgcctgcttca3'     |
| <i>CKLF</i>      | Forward | 5'gtgttgacctgtgacag3'        |
|                  | Reverse | 5'gattgaacagaagcttccg3'      |
| <i>DCAF4L2</i>   | Forward | 5'aacctctacgtccctaat3'       |
|                  | Reverse | 5'tgattcagtgaggcccagca3'     |
| <i>PRC1</i>      | Forward | 5'gaggactacacagaaagtct3'     |
|                  | Reverse | 5'tcaactctaagaaaagcct3'      |
| <i>TRIM4</i>     | Forward | 5'cagaatcctaaaagaagtgt3'     |
|                  | Reverse | 5'cagctaggtttacagccact3'     |
| <i>TUBA1B</i>    | Forward | 5'ccgctactaagaggctcca3'      |
|                  | Reverse | 5'catagtggctaggattagga3'     |
| <i>PSMD6</i>     | Forward | 5'cctctgccgtagatggacaaaag3'  |
|                  | Reverse | 5'atatccaatcggtagccagg3'     |
| <i>TNFRSF10A</i> | Forward | 5'gtccaccaggatctcatagatcag3' |
|                  | Reverse | 5'ggaagcattggtgtaaccacac3'   |
| <i>VANGLE2</i>   | Forward | 5'gggatgacaactgggggaaacg3'   |
|                  | Reverse | 5'gtgaggtcatcatgggagatgctg3' |
| <i>LRRK1</i>     | Forward | 5'acatgagatttctcgaagagcctg3' |
|                  | Reverse | 5'tggaaatcagctgtcgcagc3'     |
| <i>UBE2C</i>     | Forward | 5'gctgccagcctgtccttgt3'      |
|                  | Reverse | 5'caaacacaaaataccacagctca3'  |
| <i>CD44</i>      | Forward | 5'gatttgaatataacctgccct3'    |
|                  | Reverse | 5'ctattgaaagccttgcagagg3'    |
| <i>HDAC11</i>    | Forward | 5'atcgtgaagcgggatgagct3'     |
|                  | Reverse | 5'gtgcgcttctgtaccgcc3'       |
| <i>INPP5D</i>    | Forward | 5'ggcggggctgcattgcc3'        |
|                  | Reverse | 5'agatgggcagctgcgttctgtg3'   |
| <i>MAPK13</i>    | Forward | 5'acctggtgatgcccttcat3'      |
|                  | Reverse | 5'accaggtactggatcttct3'      |
| <i>PMEPA1</i>    | Forward | 5'gaaggatgcctgtggccct3'      |
|                  | Reverse | 5'gaggcggggcgtagacct3'       |
| <i>PRAME</i>     | Forward | 5'gcacgtgatgaacccttga3'      |
|                  | Reverse | 5'atgcatcacatcccctccga3'     |
| <i>RIPK3</i>     | Forward | 5'caaaccgaacctactcgt3'       |
|                  | Reverse | 5'gcagctcagccaatgaagg3'      |
| <i>RPS6KA1</i>   | Forward | 5'ggctccgccctgatggggca3'     |
|                  | Reverse | 5'gtatagcttattccagtcaa3'     |
| <i>SH3BP1</i>    | Forward | 5'gaccaggcccagctggatgca3'    |
|                  | Reverse | 5'tggatcagcgcctcgacgac3'     |
| <i>SORD</i>      | Forward | 5'gcttctgacaatgcacct3'       |
|                  | Reverse | 5'ggcatggatccccacagaaa3'     |
| <i>TESC</i>      | Forward | 5'ctgtccacatgtacgact3'       |
|                  | Reverse | 5'cgatattctccagatgat3'       |
| <i>VIM</i>       | Forward | 5'tcagacaggatgtgacaat3'      |
|                  | Reverse | 5'caaagattccactttgcgt3'      |
| <i>ABCC3</i>     | Forward | 5'ctcctggtgggcttctggt3'      |
|                  | Reverse | 5'gatcagcgactgcatcatgga3'    |
| <i>CLDN4</i>     | Forward | 5'cctggagactgatcccctct3'     |
|                  | Reverse | 5'accctcccaggctcattagt3'     |
| <i>KRT19</i>     | Forward | 5'gaaagctgccttggagaca3'      |
|                  | Reverse | 5'atattcggcagctgggctcca3'    |
| <i>FZD6</i>      | Forward | 5'cattttctcctctcgaatc3'      |
|                  | Reverse | 5'ttgcagaggaaagtccaatg3'     |
| <i>CARD14</i>    | Forward | 5'cggcagacctccgcagc3'        |
|                  | Reverse | 5'ctccgagacatcaagcctcc3'     |
| <i>CHMP4C</i>    | Forward | 5'agaagcctggagaactcac3'      |
|                  | Reverse | 5'tatcctgttctctgtgatctc3'    |

**Supplementary Table S3** The 681 probes for which call proportions in all examined tissue samples were less than 90%

| TargetID <sup>a</sup> | Chromosome | Gene symbol        | Call proportion (%) <sup>b</sup> |
|-----------------------|------------|--------------------|----------------------------------|
| cg00149061            | 4          | <i>UGT2A3</i>      | 88.8                             |
| cg00211215            | 6          | <i>HLA-DRB1</i>    | 88.8                             |
| cg00409917            | 6          | <i>HCG4B</i>       | 88.8                             |
| cg00639218            | Y          | <i>NA</i>          | 88.8                             |
| cg00843105            | 19         | <i>ZNF234</i>      | 88.8                             |
| cg01336390            | 6          | <i>NA</i>          | 88.8                             |
| cg01479912            | 2          | <i>PDIA6</i>       | 88.8                             |
| cg01519225            | 6          | <i>NA</i>          | 88.8                             |
| cg01757887            | Y          | <i>TTY4C</i>       | 88.8                             |
| cg02107461            | Y          | <i>NA</i>          | 88.8                             |
| cg02606988            | Y          | <i>TSPY4</i>       | 88.8                             |
| cg02775404            | 22         | <i>NA</i>          | 88.8                             |
| cg03035657            | 16         | <i>NA</i>          | 88.8                             |
| cg03344051            | 6          | <i>HLA-DQB1</i>    | 88.8                             |
| cg03398989            | 6          | <i>NA</i>          | 88.8                             |
| cg03478313            | 15         | <i>NA</i>          | 88.8                             |
| cg03673787            | 17         | <i>GAA</i>         | 88.8                             |
| cg04016144            | Y          | <i>TSPY4</i>       | 88.8                             |
| cg04691144            | Y          | <i>NLGN4Y</i>      | 88.8                             |
| cg04840108            | 4          | <i>TLR6</i>        | 88.8                             |
| cg05176970            | 17         | <i>NXN</i>         | 88.8                             |
| cg05372444            | 7          | <i>UPK3B</i>       | 88.8                             |
| cg05751189            | 2          | <i>SLC9A4</i>      | 88.8                             |
| cg06350542            | 13         | <i>MCF2L</i>       | 88.8                             |
| cg06407043            | 12         | <i>NA</i>          | 88.8                             |
| cg06576965            | Y          | <i>TTY18</i>       | 88.8                             |
| cg08357313            | Y          | <i>RBMY1A3P</i>    | 88.8                             |
| cg08634464            | 19         | <i>ZNF57</i>       | 88.8                             |
| cg08703522            | 17         | <i>NA</i>          | 88.8                             |
| cg09081202            | Y          | <i>NA</i>          | 88.8                             |
| cg09460641            | Y          | <i>NA</i>          | 88.8                             |
| cg09616536            | 3          | <i>ADAMTS9-AS2</i> | 88.8                             |
| cg10182287            | 14         | <i>ATXN3</i>       | 88.8                             |
| cg10799208            | Y          | <i>TTY10</i>       | 88.8                             |
| cg10811597            | Y          | <i>TTY14</i>       | 88.8                             |
| cg11256764            | 5          | <i>NA</i>          | 88.8                             |
| cg11844537            | 10         | <i>TCERGIL</i>     | 88.8                             |
| cg11888470            | 6          | <i>HLA-DRB6</i>    | 88.8                             |
| cg12017057            | 20         | <i>TRIB3</i>       | 88.8                             |
| cg13017022            | 5          | <i>ZMAT2</i>       | 88.8                             |
| cg14273923            | Y          | <i>NA</i>          | 88.8                             |
| cg14323910            | 6          | <i>HLA-DQB1</i>    | 88.8                             |
| cg14926231            | 2          | <i>NA</i>          | 88.8                             |
| cg15070894            | 6          | <i>HCG4B</i>       | 88.8                             |
| cg15080433            | 2          | <i>LY75-CD302</i>  | 88.8                             |
| cg15422579            | Y          | <i>EIF1AY</i>      | 88.8                             |
| cg16003256            | 1          | <i>NA</i>          | 88.8                             |
| cg16223220            | 6          | <i>HLA-H</i>       | 88.8                             |
| cg16248432            | 12         | <i>DIP2B</i>       | 88.8                             |

|            |    |          |      |
|------------|----|----------|------|
| cg16535653 | 6  | NA       | 88.8 |
| cg17089062 | 4  | NA       | 88.8 |
| cg17972491 | Y  | AMELY    | 88.8 |
| cg17982178 | 6  | NA       | 88.8 |
| cg18825597 | 8  | NA       | 88.8 |
| cg18827503 | 13 | NA       | 88.8 |
| cg21370869 | 6  | SMIM8    | 88.8 |
| cg21685655 | 7  | PON2     | 88.8 |
| cg21692241 | 6  | HLA-DQA1 | 88.8 |
| cg22025232 | 6  | HCG4B    | 88.8 |
| cg23130832 | 10 | TCERG1L  | 88.8 |
| cg23316161 | 12 | ZNF605   | 88.8 |
| cg24680646 | 13 | TRPC4    | 88.8 |
| cg24751894 | 6  | HCG4B    | 88.8 |
| cg24973221 | 10 | INPP5A   | 88.8 |
| cg25601879 | 10 | NA       | 88.8 |
| cg25914522 | Y  | NA       | 88.8 |
| cg26046487 | Y  | HSFY1    | 88.8 |
| cg26198148 | Y  | TMSB4Y   | 88.8 |
| cg26294145 | 14 | NA       | 88.8 |
| cg26482585 | 6  | NA       | 88.8 |
| cg26983535 | Y  | EIF1AY   | 88.8 |
| cg27128560 | 10 | COL17A1  | 88.8 |
| cg27433982 | Y  | ZFY      | 88.8 |
| cg27509967 | Y  | KDM5D    | 88.8 |
| cg27575622 | 17 | RPH3AL   | 88.8 |
| cg00063477 | Y  | EIF1AY   | 87.5 |
| cg00113675 | 6  | HLA-H    | 87.5 |
| cg00169792 | 20 | SALL4    | 87.5 |
| cg00213748 | Y  | NA       | 87.5 |
| cg00214611 | Y  | TMSB4Y   | 87.5 |
| cg00271873 | Y  | NA       | 87.5 |
| cg00648423 | 6  | NA       | 87.5 |
| cg00695324 | X  | TEX13B   | 87.5 |
| cg00876332 | Y  | BCORP1   | 87.5 |
| cg01426558 | Y  | DDX3Y    | 87.5 |
| cg01499815 | 6  | NA       | 87.5 |
| cg01717482 | 3  | NA       | 87.5 |
| cg01900066 | Y  | EIF1AY   | 87.5 |
| cg02011394 | Y  | TSPY8    | 87.5 |
| cg02802508 | Y  | TSPY4    | 87.5 |
| cg02914047 | X  | RNF128   | 87.5 |
| cg03231275 | 6  | BTNL2    | 87.5 |
| cg03441493 | Y  | NA       | 87.5 |
| cg03830006 | 17 | ENPP7    | 87.5 |
| cg04351468 | Y  | RBMY1A3P | 87.5 |
| cg04461745 | 17 | NA       | 87.5 |
| cg04790916 | Y  | UTY      | 87.5 |
| cg04958669 | Y  | TSPY4    | 87.5 |
| cg05276972 | 11 | NA       | 87.5 |
| cg05672930 | Y  | TXLNG2P  | 87.5 |
| cg06237805 | Y  | NA       | 87.5 |

|            |    |                   |      |
|------------|----|-------------------|------|
| cg06587249 | 19 | <i>ZNF71</i>      | 87.5 |
| cg06924902 | 8  | <i>ZFAT-AS1</i>   | 87.5 |
| cg07075387 | 4  | <i>NA</i>         | 87.5 |
| cg07368937 | 5  | <i>IRX4</i>       | 87.5 |
| cg08268047 | 1  | <i>FMO2</i>       | 87.5 |
| cg08596608 | Y  | <i>GYG2P1</i>     | 87.5 |
| cg09052185 | 6  | <i>HLA-DQA1</i>   | 87.5 |
| cg09312897 | 6  | <i>HLA-DQB1</i>   | 87.5 |
| cg09728865 | Y  | <i>TBL1Y</i>      | 87.5 |
| cg09804407 | Y  | <i>NLGN4Y</i>     | 87.5 |
| cg09829904 | Y  | <i>ZFY</i>        | 87.5 |
| cg10051237 | Y  | <i>NA</i>         | 87.5 |
| cg10115321 | 6  | <i>CSNK2B</i>     | 87.5 |
| cg10348826 | 3  | <i>NA</i>         | 87.5 |
| cg10620659 | Y  | <i>EIF1AY</i>     | 87.5 |
| cg10666546 | Y  | <i>NA</i>         | 87.5 |
| cg10691859 | Y  | <i>NCRNA00185</i> | 87.5 |
| cg10804687 | 6  | <i>NA</i>         | 87.5 |
| cg11896151 | 7  | <i>FAM20C</i>     | 87.5 |
| cg12833683 | 8  | <i>VPS13B</i>     | 87.5 |
| cg13117582 | 17 | <i>NA</i>         | 87.5 |
| cg13654344 | Y  | <i>SRY</i>        | 87.5 |
| cg14029254 | Y  | <i>RPS4Y2</i>     | 87.5 |
| cg14449180 | 6  | <i>HCG4B</i>      | 87.5 |
| cg14492024 | Y  | <i>TXLNG2P</i>    | 87.5 |
| cg14629010 | X  | <i>ZNF157</i>     | 87.5 |
| cg15161973 | 10 | <i>TCERG1L</i>    | 87.5 |
| cg15197499 | Y  | <i>TBL1Y</i>      | 87.5 |
| cg15214366 | 13 | <i>CDX2</i>       | 87.5 |
| cg15408512 | 10 | <i>TUBGCP2</i>    | 87.5 |
| cg15810474 | Y  | <i>TSPY1</i>      | 87.5 |
| cg15853771 | 2  | <i>NA</i>         | 87.5 |
| cg16443079 | 5  | <i>NA</i>         | 87.5 |
| cg16558846 | 14 | <i>NA</i>         | 87.5 |
| cg16626452 | Y  | <i>TSPY4</i>      | 87.5 |
| cg17107246 | 1  | <i>SLC25A24</i>   | 87.5 |
| cg17480035 | 6  | <i>HLA-DRB1</i>   | 87.5 |
| cg18085787 | Y  | <i>NA</i>         | 87.5 |
| cg18423635 | 6  | <i>NA</i>         | 87.5 |
| cg18697348 | 3  | <i>SELK</i>       | 87.5 |
| cg19043679 | 5  | <i>RGS14</i>      | 87.5 |
| cg19244032 | Y  | <i>NLGN4Y</i>     | 87.5 |
| cg19432688 | 2  | <i>NA</i>         | 87.5 |
| cg19676100 | 2  | <i>NA</i>         | 87.5 |
| cg19776366 | 17 | <i>BAIAP2</i>     | 87.5 |
| cg20256738 | Y  | <i>TSPY2</i>      | 87.5 |
| cg20694666 | 13 | <i>N6AMT2</i>     | 87.5 |
| cg21810411 | 6  | <i>HLA-DRB1</i>   | 87.5 |
| cg22047338 | 19 | <i>C19orf35</i>   | 87.5 |
| cg22134413 | 5  | <i>NA</i>         | 87.5 |
| cg22805356 | 15 | <i>NA</i>         | 87.5 |
| cg23472400 | 7  | <i>TAF6</i>       | 87.5 |

|            |    |                 |      |
|------------|----|-----------------|------|
| cg24845318 | X  | <i>FRMPD4</i>   | 87.5 |
| cg25644740 | 6  | <i>HCG4B</i>    | 87.5 |
| cg25918849 | Y  | <i>TTY13</i>    | 87.5 |
| cg27425262 | 2  | <i>PSD4</i>     | 87.5 |
| cg27443332 | Y  | <i>NLGN4Y</i>   | 87.5 |
| cg27521160 | 19 | <i>PSG4</i>     | 87.5 |
| cg27578568 | Y  | <i>TTY19</i>    | 87.5 |
| cg27636129 | Y  | <i>SRY</i>      | 87.5 |
| cg00212031 | Y  | <i>TTY14</i>    | 86.3 |
| cg00567916 | 9  | <i>NTNG2</i>    | 86.3 |
| cg00903245 | Y  | <i>FAMI97Y5</i> | 86.3 |
| cg01061520 | Y  | <i>NA</i>       | 86.3 |
| cg01141334 | Y  | <i>NA</i>       | 86.3 |
| cg01215343 | Y  | <i>NA</i>       | 86.3 |
| cg01238044 | 22 | <i>GSTT1</i>    | 86.3 |
| cg01493009 | 13 | <i>FOXO1</i>    | 86.3 |
| cg01644972 | Y  | <i>EIF1AY</i>   | 86.3 |
| cg01647917 | 19 | <i>GZMM</i>     | 86.3 |
| cg01988452 | Y  | <i>EIF1AY</i>   | 86.3 |
| cg02056550 | Y  | <i>TTY18</i>    | 86.3 |
| cg02126249 | Y  | <i>TSPY4</i>    | 86.3 |
| cg02233190 | Y  | <i>EIF1AY</i>   | 86.3 |
| cg02577797 | Y  | <i>ZFY</i>      | 86.3 |
| cg02730008 | Y  | <i>TMSB4Y</i>   | 86.3 |
| cg03155755 | Y  | <i>NA</i>       | 86.3 |
| cg03443143 | Y  | <i>FAMI97Y2</i> | 86.3 |
| cg03535417 | Y  | <i>FAMI97Y2</i> | 86.3 |
| cg03601053 | Y  | <i>DDX3Y</i>    | 86.3 |
| cg03767353 | Y  | <i>NA</i>       | 86.3 |
| cg04448376 | Y  | <i>UTY</i>      | 86.3 |
| cg04817258 | Y  | <i>NA</i>       | 86.3 |
| cg04831594 | Y  | <i>NA</i>       | 86.3 |
| cg05202434 | Y  | <i>TTY19</i>    | 86.3 |
| cg05362314 | 4  | <i>NA</i>       | 86.3 |
| cg05865243 | Y  | <i>TSPY2</i>    | 86.3 |
| cg05940236 | Y  | <i>DDX3Y</i>    | 86.3 |
| cg06064954 | 6  | <i>NA</i>       | 86.3 |
| cg06502680 | Y  | <i>TXLNG2P</i>  | 86.3 |
| cg06636270 | Y  | <i>TTY20</i>    | 86.3 |
| cg06844719 | 16 | <i>NA</i>       | 86.3 |
| cg06850186 | 7  | <i>NA</i>       | 86.3 |
| cg08147391 | X  | <i>CXorf56</i>  | 86.3 |
| cg08242338 | Y  | <i>TSPY2</i>    | 86.3 |
| cg08820785 | Y  | <i>EIF1AY</i>   | 86.3 |
| cg09194930 | 16 | <i>MTIL</i>     | 86.3 |
| cg09228985 | Y  | <i>BCORP1</i>   | 86.3 |
| cg09230658 | Y  | <i>NA</i>       | 86.3 |
| cg09732580 | Y  | <i>NA</i>       | 86.3 |
| cg10018004 | 6  | <i>HLA-A</i>    | 86.3 |
| cg11507597 | 12 | <i>NA</i>       | 86.3 |
| cg11942206 | 19 | <i>PSG1</i>     | 86.3 |
| cg11967332 | 1  | <i>SLC25A24</i> | 86.3 |

|            |    |                 |      |
|------------|----|-----------------|------|
| cg13141283 | 13 | <i>PCDH20</i>   | 86.3 |
| cg13618458 | Y  | <i>NA</i>       | 86.3 |
| cg13808036 | Y  | <i>RBMY2FP</i>  | 86.3 |
| cg14442616 | Y  | <i>DDX3Y</i>    | 86.3 |
| cg14463736 | Y  | <i>TMSB4Y</i>   | 86.3 |
| cg15329860 | Y  | <i>KDM5D</i>    | 86.3 |
| cg15591384 | 6  | <i>HLA-DRB6</i> | 86.3 |
| cg16662938 | 10 | <i>GUCY2GP</i>  | 86.3 |
| cg16886051 | 11 | <i>GVINP1</i>   | 86.3 |
| cg17025908 | 1  | <i>NA</i>       | 86.3 |
| cg17370981 | 13 | <i>ATP4B</i>    | 86.3 |
| cg17430262 | Y  | <i>NA</i>       | 86.3 |
| cg17560699 | Y  | <i>UTY</i>      | 86.3 |
| cg17834650 | Y  | <i>FAM197Y5</i> | 86.3 |
| cg18168924 | Y  | <i>PRKY</i>     | 86.3 |
| cg18442075 | 17 | <i>NKIRAS2</i>  | 86.3 |
| cg19600472 | 6  | <i>HCG4B</i>    | 86.3 |
| cg20401549 | Y  | <i>PRKY</i>     | 86.3 |
| cg20764275 | Y  | <i>NA</i>       | 86.3 |
| cg21234342 | 6  | <i>GPR116</i>   | 86.3 |
| cg21543103 | 5  | <i>PAPD7</i>    | 86.3 |
| cg22627029 | 6  | <i>HLA-DRB6</i> | 86.3 |
| cg23340935 | 2  | <i>DIRC3</i>    | 86.3 |
| cg23877661 | X  | <i>GABRQ</i>    | 86.3 |
| cg25443613 | Y  | <i>RPS4Y1</i>   | 86.3 |
| cg25538674 | Y  | <i>TSPY8</i>    | 86.3 |
| cg25613667 | 5  | <i>WDR55</i>    | 86.3 |
| cg25730351 | 11 | <i>ANO1</i>     | 86.3 |
| cg25815185 | Y  | <i>KDM5D</i>    | 86.3 |
| cg26488634 | Y  | <i>NA</i>       | 86.3 |
| cg26651280 | 16 | <i>GALNS</i>    | 86.3 |
| cg26924012 | 15 | <i>SPATA5L1</i> | 86.3 |
| cg26928789 | Y  | <i>TTY10</i>    | 86.3 |
| cg27214488 | Y  | <i>NLGN4Y</i>   | 86.3 |
| cg27325772 | Y  | <i>NA</i>       | 86.3 |
| cg00050873 | Y  | <i>FAM197Y5</i> | 85.0 |
| cg00308367 | Y  | <i>KDM5D</i>    | 85.0 |
| cg00543493 | Y  | <i>TSPY4</i>    | 85.0 |
| cg00599377 | Y  | <i>NA</i>       | 85.0 |
| cg00679624 | Y  | <i>NA</i>       | 85.0 |
| cg00727777 | 8  | <i>NA</i>       | 85.0 |
| cg00762184 | Y  | <i>TTY15</i>    | 85.0 |
| cg00988056 | 14 | <i>NA</i>       | 85.0 |
| cg01073572 | Y  | <i>NLGN4Y</i>   | 85.0 |
| cg01232331 | 2  | <i>NA</i>       | 85.0 |
| cg01523029 | Y  | <i>TSPY4</i>    | 85.0 |
| cg01943289 | Y  | <i>RPS4Y2</i>   | 85.0 |
| cg01984154 | Y  | <i>RPS4Y1</i>   | 85.0 |
| cg02105393 | Y  | <i>ZFY</i>      | 85.0 |
| cg02522936 | Y  | <i>TTY10</i>    | 85.0 |
| cg02839557 | Y  | <i>TBL1Y</i>    | 85.0 |
| cg03052502 | Y  | <i>FAM197Y2</i> | 85.0 |

|            |    |                     |      |
|------------|----|---------------------|------|
| cg03266527 | Y  | <i>UTY</i>          | 85.0 |
| cg03416979 | Y  | <i>NA</i>           | 85.0 |
| cg03430010 | Y  | <i>UTY</i>          | 85.0 |
| cg03533500 | Y  | <i>NA</i>           | 85.0 |
| cg03905640 | Y  | <i>FAM41AY2</i>     | 85.0 |
| cg04042030 | Y  | <i>TBL1Y</i>        | 85.0 |
| cg04387098 | X  | <i>EBP</i>          | 85.0 |
| cg04419680 | Y  | <i>NLGN4Y</i>       | 85.0 |
| cg04576441 | Y  | <i>NA</i>           | 85.0 |
| cg04840163 | Y  | <i>ZFY</i>          | 85.0 |
| cg05098815 | Y  | <i>RBMY3AP</i>      | 85.0 |
| cg05128824 | Y  | <i>DDX3Y</i>        | 85.0 |
| cg05367916 | Y  | <i>NA</i>           | 85.0 |
| cg05408674 | Y  | <i>NA</i>           | 85.0 |
| cg05480730 | Y  | <i>PRKY</i>         | 85.0 |
| cg05621349 | Y  | <i>TXLNG2P</i>      | 85.0 |
| cg05954446 | Y  | <i>AMELY</i>        | 85.0 |
| cg06008419 | 8  | <i>NA</i>           | 85.0 |
| cg06060201 | Y  | <i>FAM224A</i>      | 85.0 |
| cg06075393 | 20 | <i>RASSF2</i>       | 85.0 |
| cg06231362 | Y  | <i>NA</i>           | 85.0 |
| cg06461588 | 20 | <i>DNAJC5</i>       | 85.0 |
| cg06634367 | 17 | <i>RCVRN</i>        | 85.0 |
| cg06647930 | 22 | <i>PRR5-ARHGAP8</i> | 85.0 |
| cg07559763 | 8  | <i>NA</i>           | 85.0 |
| cg07939587 | Y  | <i>NA</i>           | 85.0 |
| cg07950979 | Y  | <i>UTY</i>          | 85.0 |
| cg08053115 | Y  | <i>TTY1</i>         | 85.0 |
| cg08160949 | Y  | <i>NA</i>           | 85.0 |
| cg08314875 | Y  | <i>DDX3Y</i>        | 85.0 |
| cg08593141 | Y  | <i>NA</i>           | 85.0 |
| cg08816194 | Y  | <i>NLGN4Y</i>       | 85.0 |
| cg09408193 | Y  | <i>NA</i>           | 85.0 |
| cg09595415 | Y  | <i>SRY</i>          | 85.0 |
| cg09856092 | Y  | <i>DDX3Y</i>        | 85.0 |
| cg10239257 | Y  | <i>TSPY3</i>        | 85.0 |
| cg10267609 | Y  | <i>RBMY2FP</i>      | 85.0 |
| cg10363397 | Y  | <i>NA</i>           | 85.0 |
| cg10536901 | 1  | <i>SLC25A24</i>     | 85.0 |
| cg10557773 | Y  | <i>ZFY</i>          | 85.0 |
| cg10646950 | Y  | <i>TTY9A</i>        | 85.0 |
| cg10772532 | 14 | <i>CEP128</i>       | 85.0 |
| cg11019305 | 5  | <i>UBTD2</i>        | 85.0 |
| cg11225091 | Y  | <i>EIF1AY</i>       | 85.0 |
| cg11684211 | Y  | <i>TTY14</i>        | 85.0 |
| cg11816202 | Y  | <i>TTY14</i>        | 85.0 |
| cg11919336 | 12 | <i>HCAR2</i>        | 85.0 |
| cg13268984 | Y  | <i>NA</i>           | 85.0 |
| cg13419214 | Y  | <i>TTY8B</i>        | 85.0 |
| cg13636640 | 20 | <i>DNMT3B</i>       | 85.0 |
| cg13830619 | 12 | <i>NA</i>           | 85.0 |
| cg14104700 | 13 | <i>MIPEPP3</i>      | 85.0 |



|            |    |            |      |
|------------|----|------------|------|
| cg14151065 | Y  | NA         | 85.0 |
| cg14669863 | 1  | HCN3       | 85.0 |
| cg14741114 | Y  | TTY15      | 85.0 |
| cg14742615 | Y  | NA         | 85.0 |
| cg15059553 | Y  | EIF1AY     | 85.0 |
| cg15281205 | Y  | TTY14      | 85.0 |
| cg15345074 | Y  | TTY14      | 85.0 |
| cg16292375 | Y  | FAM224A    | 85.0 |
| cg16894943 | Y  | FAM224A    | 85.0 |
| cg17520080 | 1  | LUZP1      | 85.0 |
| cg18015625 | 2  | B3GALT1    | 85.0 |
| cg18058072 | Y  | ZFY        | 85.0 |
| cg18077436 | Y  | DDX3Y      | 85.0 |
| cg18163559 | Y  | NA         | 85.0 |
| cg20951645 | X  | BGN        | 85.0 |
| cg21164095 | 1  | BAI2       | 85.0 |
| cg22696546 | 1  | CNST       | 85.0 |
| cg24120210 | 7  | RADIL      | 85.0 |
| cg24183504 | Y  | NA         | 85.0 |
| cg24837623 | Y  | ZFY        | 85.0 |
| cg25395304 | 19 | ZNF234     | 85.0 |
| cg25427172 | Y  | NA         | 85.0 |
| cg25667057 | Y  | NA         | 85.0 |
| cg25705492 | Y  | TSPY4      | 85.0 |
| cg25756647 | Y  | TXLNG2P    | 85.0 |
| cg25971649 | 1  | CD58       | 85.0 |
| cg26497631 | Y  | NA         | 85.0 |
| cg26590106 | 6  | HLA-DRB1   | 85.0 |
| cg27441354 | 7  | NA         | 85.0 |
| cg00035864 | Y  | TTY18      | 83.8 |
| cg00061679 | Y  | DAZ1       | 83.8 |
| cg00103771 | 6  | HLA-DRB6   | 83.8 |
| cg00121626 | Y  | BCORP1     | 83.8 |
| cg00272582 | Y  | ZFY        | 83.8 |
| cg00311963 | Y  | TTY23      | 83.8 |
| cg00479827 | Y  | NCRNA00185 | 83.8 |
| cg00742920 | 13 | NA         | 83.8 |
| cg00789540 | Y  | NA         | 83.8 |
| cg00886571 | 14 | NA         | 83.8 |
| cg00975375 | Y  | NA         | 83.8 |
| cg01498999 | Y  | NLGN4Y     | 83.8 |
| cg01828798 | Y  | TTY19      | 83.8 |
| cg02012379 | Y  | RPS4Y2     | 83.8 |
| cg02050847 | Y  | RPS4Y2     | 83.8 |
| cg02129146 | Y  | NA         | 83.8 |
| cg02340092 | Y  | NLGN4Y     | 83.8 |
| cg02352633 | Y  | RBMV2EP    | 83.8 |
| cg02616328 | Y  | ZFY        | 83.8 |
| cg02751273 | 2  | NA         | 83.8 |
| cg02764429 | 15 | PRKXP1     | 83.8 |
| cg02842889 | Y  | ZFY        | 83.8 |
| cg02847425 | 7  | UPK3B      | 83.8 |

|            |    |                |      |
|------------|----|----------------|------|
| cg03123709 | Y  | <i>TMSB4Y</i>  | 83.8 |
| cg03672679 | Y  | <i>NA</i>      | 83.8 |
| cg03683899 | Y  | <i>ZFY</i>     | 83.8 |
| cg03750315 | Y  | <i>EIF1AY</i>  | 83.8 |
| cg03769088 | Y  | <i>NA</i>      | 83.8 |
| cg03827298 | Y  | <i>RBMY2FP</i> | 83.8 |
| cg04123665 | Y  | <i>NA</i>      | 83.8 |
| cg04169747 | Y  | <i>SRY</i>     | 83.8 |
| cg04193779 | Y  | <i>TTY20</i>   | 83.8 |
| cg04303809 | Y  | <i>NA</i>      | 83.8 |
| cg04559508 | Y  | <i>NA</i>      | 83.8 |
| cg04879348 | 2  | <i>GCC2</i>    | 83.8 |
| cg05378695 | Y  | <i>TTY8B</i>   | 83.8 |
| cg05530472 | Y  | <i>AMELY</i>   | 83.8 |
| cg05544622 | Y  | <i>TSPY1</i>   | 83.8 |
| cg05557315 | Y  | <i>NA</i>      | 83.8 |
| cg05725925 | Y  | <i>TXLNG2P</i> | 83.8 |
| cg05890011 | Y  | <i>TTY15</i>   | 83.8 |
| cg05964935 | Y  | <i>NA</i>      | 83.8 |
| cg06206057 | 6  | <i>NA</i>      | 83.8 |
| cg06322277 | Y  | <i>RPS4Y2</i>  | 83.8 |
| cg06479204 | Y  | <i>UTY</i>     | 83.8 |
| cg06587955 | Y  | <i>TSPY3</i>   | 83.8 |
| cg06628792 | Y  | <i>TTY14</i>   | 83.8 |
| cg06865724 | Y  | <i>TTY5</i>    | 83.8 |
| cg07731488 | Y  | <i>TXLNG2P</i> | 83.8 |
| cg07747963 | Y  | <i>RPS4Y2</i>  | 83.8 |
| cg08258654 | Y  | <i>TSPY4</i>   | 83.8 |
| cg08528516 | Y  | <i>DDX3Y</i>   | 83.8 |
| cg08589776 | 4  | <i>NA</i>      | 83.8 |
| cg08673225 | Y  | <i>RPS4Y1</i>  | 83.8 |
| cg08702825 | Y  | <i>NA</i>      | 83.8 |
| cg08739478 | Y  | <i>NA</i>      | 83.8 |
| cg08921682 | Y  | <i>TBL1Y</i>   | 83.8 |
| cg10067523 | Y  | <i>TTY11</i>   | 83.8 |
| cg10076560 | Y  | <i>TXLNG2P</i> | 83.8 |
| cg10172760 | Y  | <i>EIF1AY</i>  | 83.8 |
| cg10338539 | Y  | <i>SRY</i>     | 83.8 |
| cg10593480 | Y  | <i>EIF1AY</i>  | 83.8 |
| cg10698069 | Y  | <i>DDX3Y</i>   | 83.8 |
| cg11021362 | Y  | <i>TTY13</i>   | 83.8 |
| cg11131351 | Y  | <i>ZFY</i>     | 83.8 |
| cg11193865 | 14 | <i>DLK1</i>    | 83.8 |
| cg11454325 | 10 | <i>GPR123</i>  | 83.8 |
| cg11898347 | Y  | <i>SRY</i>     | 83.8 |
| cg12126656 | 10 | <i>INPP5A</i>  | 83.8 |
| cg13252613 | Y  | <i>TTY23B</i>  | 83.8 |
| cg13281118 | X  | <i>GAGE2C</i>  | 83.8 |
| cg13308744 | Y  | <i>EIF1AY</i>  | 83.8 |
| cg13311805 | 11 | <i>OR4S2</i>   | 83.8 |
| cg13749113 | 15 | <i>NA</i>      | 83.8 |
| cg13805219 | Y  | <i>NA</i>      | 83.8 |

|            |    |                  |      |
|------------|----|------------------|------|
| cg13845521 | Y  | <i>TTY14</i>     | 83.8 |
| cg14005657 | Y  | <i>TSPY3</i>     | 83.8 |
| cg14133106 | Y  | <i>NA</i>        | 83.8 |
| cg14157445 | Y  | <i>TTY15</i>     | 83.8 |
| cg14526044 | Y  | <i>ZFY</i>       | 83.8 |
| cg14671357 | Y  | <i>TTY12</i>     | 83.8 |
| cg14778208 | Y  | <i>TTY16</i>     | 83.8 |
| cg14931215 | Y  | <i>KDM5D</i>     | 83.8 |
| cg14972466 | Y  | <i>ZFY</i>       | 83.8 |
| cg15014361 | 6  | <i>HLA-DQA1</i>  | 83.8 |
| cg15141401 | 11 | <i>OR4C11</i>    | 83.8 |
| cg15273954 | Y  | <i>TTY15</i>     | 83.8 |
| cg15429127 | Y  | <i>DDX3Y</i>     | 83.8 |
| cg15462332 | Y  | <i>RBMY1D</i>    | 83.8 |
| cg15535896 | 18 | <i>NA</i>        | 83.8 |
| cg15563434 | Y  | <i>NA</i>        | 83.8 |
| cg15662272 | Y  | <i>KDM5D</i>     | 83.8 |
| cg15682993 | Y  | <i>TXLNG2P</i>   | 83.8 |
| cg15700967 | Y  | <i>TBL1Y</i>     | 83.8 |
| cg15746461 | Y  | <i>TTY15</i>     | 83.8 |
| cg15849038 | Y  | <i>NA</i>        | 83.8 |
| cg16733676 | 1  | <i>SLC25A24</i>  | 83.8 |
| cg17422543 | 2  | <i>NA</i>        | 83.8 |
| cg17626671 | 7  | <i>EPHA1-AS1</i> | 83.8 |
| cg17837162 | Y  | <i>TSPY4</i>     | 83.8 |
| cg17939569 | Y  | <i>DAZ2</i>      | 83.8 |
| cg18032798 | Y  | <i>TMSB4Y</i>    | 83.8 |
| cg19726599 | 4  | <i>AFAP1</i>     | 83.8 |
| cg20864678 | Y  | <i>TXLNG2P</i>   | 83.8 |
| cg21114725 | 3  | <i>NA</i>        | 83.8 |
| cg21442271 | 22 | <i>NA</i>        | 83.8 |
| cg22051787 | Y  | <i>RBMY1J</i>    | 83.8 |
| cg24393100 | Y  | <i>NA</i>        | 83.8 |
| cg25518695 | Y  | <i>NLGN4Y</i>    | 83.8 |
| cg25598710 | 2  | <i>NA</i>        | 83.8 |
| cg25704368 | Y  | <i>TTY20</i>     | 83.8 |
| cg26517491 | Y  | <i>KDM5D</i>     | 83.8 |
| cg27049643 | Y  | <i>KDM5D</i>     | 83.8 |
| cg27112983 | 16 | <i>NA</i>        | 83.8 |
| cg27545697 | Y  | <i>NA</i>        | 83.8 |
| cg27611726 | Y  | <i>TBL1Y</i>     | 83.8 |
| cg00978846 | 6  | <i>HLA-DQA1</i>  | 82.5 |
| cg01550813 | 7  | <i>NA</i>        | 82.5 |
| cg02262167 | 13 | <i>NA</i>        | 82.5 |
| cg03187668 | 11 | <i>OR4C6</i>     | 82.5 |
| cg03466083 | 5  | <i>NA</i>        | 82.5 |
| cg03999583 | 3  | <i>NA</i>        | 82.5 |
| cg08231637 | 6  | <i>HLA-DRB1</i>  | 82.5 |
| cg09462281 | 19 | <i>NCLN</i>      | 82.5 |
| cg10325211 | 2  | <i>NA</i>        | 82.5 |
| cg10769535 | 1  | <i>DNM3OS</i>    | 82.5 |
| cg13685349 | 14 | <i>STON2</i>     | 82.5 |

|            |    |                |      |
|------------|----|----------------|------|
| cg15225267 | 6  | NA             | 82.5 |
| cg17446339 | 11 | HTATIP2        | 82.5 |
| cg17901463 | 1  | GSTM1          | 82.5 |
| cg18433519 | 6  | KIAA0319       | 82.5 |
| cg18474443 | 10 | PFKP           | 82.5 |
| cg18792536 | 7  | UPK3B          | 82.5 |
| cg26657539 | 4  | NA             | 82.5 |
| cg27107292 | 6  | HLA-DRB1       | 82.5 |
| cg27257987 | 19 | PSG4           | 82.5 |
| cg01469864 | 5  | CPLX2          | 81.3 |
| cg01790920 | 5  | IRX1           | 81.3 |
| cg03271827 | 4  | PCGF3          | 81.3 |
| cg04057378 | 20 | NA             | 81.3 |
| cg07643074 | 4  | NA             | 81.3 |
| cg09988111 | 16 | NA             | 81.3 |
| cg10123347 | 14 | DDHD1          | 81.3 |
| cg10747483 | 19 | NA             | 81.3 |
| cg11727304 | 7  | GALNTL5        | 81.3 |
| cg12074150 | 2  | NA             | 81.3 |
| cg12391576 | 6  | HLA-DPA1       | 81.3 |
| cg13910785 | 6  | HLA-DRB1       | 81.3 |
| cg14181874 | 2  | NA             | 81.3 |
| cg14186264 | 6  | C6orf58        | 81.3 |
| cg21697769 | 2  | AGAP1          | 81.3 |
| cg22304543 | 8  | NA             | 81.3 |
| cg22802296 | 1  | PBX1           | 81.3 |
| cg01546248 | 22 | SMTN           | 80.0 |
| cg01600516 | 17 | ALOX12         | 80.0 |
| cg01914365 | 3  | NA             | 80.0 |
| cg02234672 | 13 | NA             | 80.0 |
| cg03183700 | 8  | ANK1           | 80.0 |
| cg06001854 | 5  | SCAMP1         | 80.0 |
| cg07765982 | Y  | TTY1           | 80.0 |
| cg07904290 | 16 | NA             | 80.0 |
| cg08299859 | 10 | NA             | 80.0 |
| cg08433110 | 6  | GMDS           | 80.0 |
| cg10217052 | 6  | HLA-DQA1       | 80.0 |
| cg12770425 | 6  | NA             | 80.0 |
| cg14555649 | 6  | DKFZP686I15217 | 80.0 |
| cg14803009 | 2  | MSH2           | 80.0 |
| cg14834300 | 1  | NA             | 80.0 |
| cg15954684 | 3  | NA             | 80.0 |
| cg22993154 | 6  | NA             | 80.0 |
| cg24760581 | 6  | HLA-DRB1       | 80.0 |
| cg01317752 | X  | VCX            | 78.8 |
| cg03391002 | 12 | WSCD2          | 78.8 |
| cg05028071 | X  | TFE3           | 78.8 |
| cg08335702 | 12 | MTERFD3        | 78.8 |
| cg11170468 | 11 | OR8G1          | 78.8 |
| cg14457452 | 9  | CDK5RAP2       | 78.8 |
| cg14799809 | 6  | HLA-DQA1       | 78.8 |
| cg15577010 | 2  | NMUR1          | 78.8 |

|            |    |                         |      |
|------------|----|-------------------------|------|
| cg16034991 | 19 | <i>SIGLEC14</i>         | 78.8 |
| cg17976473 | 10 | <i>DMBT1</i>            | 78.8 |
| cg23954274 | 10 | <i>NA</i>               | 78.8 |
| cg01157718 | 6  | <i>NA</i>               | 77.5 |
| cg04937939 | 2  | <i>NA</i>               | 77.5 |
| cg05546241 | 6  | <i>NA</i>               | 77.5 |
| cg06012695 | 6  | <i>NA</i>               | 77.5 |
| cg08208480 | 11 | <i>BRSK2</i>            | 77.5 |
| cg10099275 | 12 | <i>PLCZ1</i>            | 77.5 |
| cg10546252 | 22 | <i>GSTT1</i>            | 77.5 |
| cg11987751 | 1  | <i>SLC35E2</i>          | 77.5 |
| cg13739333 | 6  | <i>HLA-DRB5</i>         | 77.5 |
| cg14359894 | 20 | <i>RASSF2</i>           | 77.5 |
| cg15244290 | 6  | <i>GUCA1A</i>           | 77.5 |
| cg15700429 | 6  | <i>HLA-DRB6</i>         | 77.5 |
| cg16661157 | 17 | <i>PRKCA</i>            | 77.5 |
| cg20336016 | 19 | <i>NA</i>               | 77.5 |
| cg20968290 | 6  | <i>CDKAL1</i>           | 77.5 |
| cg23007425 | 14 | <i>NA</i>               | 77.5 |
| cg24565820 | 22 | <i>LOC391322</i>        | 77.5 |
| cg25120325 | 10 | <i>PNLIPRP2</i>         | 77.5 |
| cg27362989 | 6  | <i>HLA-DRB5</i>         | 77.5 |
| cg01253711 | 4  | <i>NA</i>               | 76.3 |
| cg14075454 | 6  | <i>HLA-DRB1</i>         | 76.3 |
| cg15253861 | 6  | <i>HLA-DPA1</i>         | 76.3 |
| cg15654485 | 6  | <i>HLA-DRB6</i>         | 76.3 |
| cg18428180 | 6  | <i>KIAA0319</i>         | 76.3 |
| cg18500967 | 7  | <i>NA</i>               | 76.3 |
| cg18868178 | 10 | <i>NA</i>               | 76.3 |
| cg18938907 | 1  | <i>GSTM1</i>            | 76.3 |
| cg20908200 | 20 | <i>SNAP25-AS1</i>       | 76.3 |
| cg21741515 | 3  | <i>TM4SF19-TCTEX1D2</i> | 76.3 |
| cg23536255 | 6  | <i>NA</i>               | 76.3 |
| cg26430986 | 5  | <i>GABRP</i>            | 76.3 |
| cg01710670 | 16 | <i>NA</i>               | 75.0 |
| cg05919324 | 17 | <i>RPH3AL</i>           | 75.0 |
| cg07119157 | 1  | <i>TNFRSF18</i>         | 75.0 |
| cg07777042 | 8  | <i>NA</i>               | 75.0 |
| cg12015991 | 6  | <i>HLA-DRB5</i>         | 75.0 |
| cg12182903 | 4  | <i>NA</i>               | 75.0 |
| cg14035247 | 4  | <i>NA</i>               | 75.0 |
| cg15410402 | X  | <i>KRBOX4</i>           | 75.0 |
| cg15680603 | 6  | <i>HLA-DPA1</i>         | 75.0 |
| cg17421046 | 6  | <i>HLA-DQA1</i>         | 75.0 |
| cg19516921 | 6  | <i>HLA-DRB5</i>         | 75.0 |
| cg00013655 | 16 | <i>PIGQ</i>             | 73.8 |
| cg03296304 | 11 | <i>DEAF1</i>            | 73.8 |
| cg04277055 | 4  | <i>NA</i>               | 73.8 |
| cg06398883 | 13 | <i>NA</i>               | 73.8 |
| cg06573709 | 6  | <i>NA</i>               | 73.8 |
| cg10662395 | 19 | <i>HCN2</i>             | 73.8 |
| cg13312387 | 2  | <i>NMURI</i>            | 73.8 |

|            |    |                  |      |
|------------|----|------------------|------|
| cg16997375 | 22 | <i>GSTT1</i>     | 73.8 |
| cg20311868 | 7  | <i>WBSCR27</i>   | 73.8 |
| cg20593128 | X  | <i>NA</i>        | 73.8 |
| cg02126896 | 11 | <i>NA</i>        | 72.5 |
| cg04777551 | 6  | <i>HLA-DQB1</i>  | 72.5 |
| cg06559318 | 6  | <i>HLA-DRB6</i>  | 72.5 |
| cg07774765 | 5  | <i>BTNL9</i>     | 72.5 |
| cg08708231 | 11 | <i>OPCML</i>     | 72.5 |
| cg14740251 | 19 | <i>NA</i>        | 72.5 |
| cg15293181 | 2  | <i>SNTG2</i>     | 72.5 |
| cg00534215 | 16 | <i>ACSF3</i>     | 71.3 |
| cg00814186 | 17 | <i>NA</i>        | 71.3 |
| cg01474688 | 2  | <i>SP3</i>       | 71.3 |
| cg03216697 | 6  | <i>HLA-C</i>     | 71.3 |
| cg04649587 | 8  | <i>TDH</i>       | 71.3 |
| cg06180910 | 22 | <i>GSTT1</i>     | 71.3 |
| cg11834635 | 4  | <i>ZFYVE28</i>   | 71.3 |
| cg12846737 | 6  | <i>NA</i>        | 71.3 |
| cg14294953 | 9  | <i>MIR4289</i>   | 71.3 |
| cg16514085 | 6  | <i>HLA-DRB1</i>  | 71.3 |
| cg19976037 | 17 | <i>CCDC57</i>    | 71.3 |
| cg20945531 | 6  | <i>FLJ34503</i>  | 71.3 |
| cg23905789 | 6  | <i>HLA-DRB1</i>  | 71.3 |
| cg24205048 | 19 | <i>SIGLEC5</i>   | 71.3 |
| cg24238852 | 22 | <i>GSTT1</i>     | 71.3 |
| cg01445689 | 7  | <i>WDR60</i>     | 70.0 |
| cg02145102 | 6  | <i>NA</i>        | 70.0 |
| cg07258408 | 2  | <i>TSSC1</i>     | 70.0 |
| cg07642767 | 10 | <i>NA</i>        | 70.0 |
| cg08759036 | X  | <i>OCRL</i>      | 70.0 |
| cg10032131 | 11 | <i>SLC43A1</i>   | 70.0 |
| cg14744161 | 6  | <i>DSE</i>       | 70.0 |
| cg18021992 | 20 | <i>ITPA</i>      | 70.0 |
| cg19032705 | 5  | <i>SH3PXD2B</i>  | 70.0 |
| cg20064778 | 22 | <i>GSTT1</i>     | 70.0 |
| cg22956547 | 19 | <i>ZNF155</i>    | 70.0 |
| cg23505044 | 17 | <i>NTN1</i>      | 70.0 |
| cg25664050 | 6  | <i>HLA-DRB6</i>  | 70.0 |
| cg27129755 | 5  | <i>GABRP</i>     | 70.0 |
| cg03959986 | 17 | <i>SRR</i>       | 68.8 |
| cg04824771 | 22 | <i>LOC391322</i> | 68.8 |
| cg04953552 | 6  | <i>NA</i>        | 68.8 |
| cg10995422 | 6  | <i>HLA-DRB6</i>  | 68.8 |
| cg11478607 | 22 | <i>GSTT1</i>     | 68.8 |
| cg17831170 | 6  | <i>NA</i>        | 68.8 |
| cg18576210 | 6  | <i>HIST1H2AB</i> | 68.8 |
| cg01707391 | 16 | <i>NA</i>        | 67.5 |
| cg01744396 | 22 | <i>GSTT1</i>     | 67.5 |
| cg06236987 | 6  | <i>FLJ34503</i>  | 67.5 |
| cg08219170 | 22 | <i>GSTT1</i>     | 67.5 |
| cg08702834 | 9  | <i>DMRT3</i>     | 67.5 |
| cg11317459 | 13 | <i>MIPEPP3</i>   | 67.5 |

|            |    |              |      |
|------------|----|--------------|------|
| cg11849573 | 7  | NA           | 67.5 |
| cg13004509 | 11 | CCDC67       | 67.5 |
| cg13365400 | Y  | TTY4C        | 67.5 |
| cg14310877 | 6  | NA           | 67.5 |
| cg15048554 | 12 | BTBD11       | 67.5 |
| cg16699528 | 7  | PVRIG        | 67.5 |
| cg17724121 | 11 | HBE1         | 67.5 |
| cg02018764 | 8  | NA           | 66.3 |
| cg03965138 | 19 | SIGLEC5      | 66.3 |
| cg05208607 | 16 | TLDC1        | 66.3 |
| cg05708441 | 2  | NA           | 66.3 |
| cg10506445 | 1  | NR5A2        | 66.3 |
| cg22666875 | 22 | GSTTP1       | 66.3 |
| cg26709433 | 6  | NA           | 66.3 |
| cg27627215 | 8  | NA           | 66.3 |
| cg01500431 | 22 | GSTTP2       | 65.0 |
| cg01957799 | 22 | GSTT1        | 65.0 |
| cg02943303 | 2  | TXNDC9       | 65.0 |
| cg13874759 | 17 | ENPP7        | 65.0 |
| cg16808927 | 16 | WDR90        | 65.0 |
| cg26881268 | 11 | NA           | 65.0 |
| cg00259849 | 8  | CSMD1        | 63.8 |
| cg05380919 | 22 | GSTT1        | 63.8 |
| cg22681945 | 1  | NA           | 63.8 |
| cg24336839 | 22 | GSTT1        | 63.8 |
| cg04926385 | 8  | NA           | 62.5 |
| cg15254640 | 22 | GSTT1        | 62.5 |
| cg00873648 | 6  | NA           | 61.3 |
| cg03007623 | 19 | CDKN2D       | 61.3 |
| cg07225509 | 5  | GALNT10      | 61.3 |
| cg11791288 | 1  | LOC284551    | 61.3 |
| cg20060160 | 1  | NMNAT2       | 61.3 |
| cg10804726 | 17 | DNAI2        | 60.0 |
| cg00256329 | 17 | NXN          | 58.8 |
| cg12546355 | 7  | NA           | 58.8 |
| cg22653957 | 2  | ALPPL2       | 58.8 |
| cg24098252 | 12 | GPR133       | 58.8 |
| cg02902672 | 6  | HLA-DQB1     | 57.5 |
| cg10385522 | 6  | HLA-DRB1     | 57.5 |
| cg11866463 | 21 | RCAN1        | 57.5 |
| cg19648023 | 2  | MIR548N      | 56.3 |
| cg27156510 | 17 | B9DI         | 56.3 |
| cg05419812 | 6  | NA           | 55.0 |
| cg00303108 | X  | RBM41        | 53.8 |
| cg09476440 | 1  | KIAA1324     | 53.8 |
| cg17251423 | 5  | NA           | 53.8 |
| cg14117320 | 11 | PLEKHA7      | 52.5 |
| cg12280242 | 4  | NA           | 51.3 |
| cg09307193 | 14 | ACTN1        | 50.0 |
| cg22764591 | 12 | LOC100506844 | 47.5 |
| cg18845950 | 6  | NA           | 46.3 |
| cg05341252 | 6  | HLA-DQB1     | 45.0 |

|            |    |                 |      |
|------------|----|-----------------|------|
| cg23699809 | 8  | <i>INTS9</i>    | 43.8 |
| cg19235801 | 10 | <i>NA</i>       | 42.5 |
| cg01550828 | 3  | <i>RNF168</i>   | 41.3 |
| cg07811112 | 15 | <i>NA</i>       | 40.0 |
| cg00749520 | 19 | <i>TMEM238</i>  | 32.5 |
| cg15544633 | 2  | <i>LIPT1</i>    | 32.5 |
| cg25985455 | 20 | <i>PSMA7</i>    | 31.3 |
| cg24834873 | 5  | <i>ANKRD34B</i> | 16.3 |

---

<sup>a</sup>Probe ID of the Infinium HumanMethylation 450 BeadChip. <sup>b</sup>*P*-values for detection of a signal above the background >0.01. NA, not annotated (designed for the intergenic regions). Since low call proportions may have been attributable to polymorphism at the probe CpG sites, the above 681 probes were excluded from the present assay.



**Supplementary Table S4** The 219 genes showing significant inverse correlations between DNA methylation and mRNA expression levels (correlation coefficient  $[r] < -0.25$  and  $P < 0.05$ ) using The Cancer Genome Atlas database (<https://cancergenome.nih.gov>)

| Gene Symbol      | Probe ID <sup>a</sup> | CpG type <sup>b</sup>     | Annotation <sup>c</sup> | Type of cancer <sup>d</sup> | R      | P       |
|------------------|-----------------------|---------------------------|-------------------------|-----------------------------|--------|---------|
| <i>A2LD1</i>     | cg25710107            | S_Shelf                   | TSS1500                 | LIHC                        | -0.312 | < 0.001 |
|                  |                       |                           |                         | KIRC                        | -0.284 | < 0.001 |
| <i>ABCC3</i>     | cg27222669            | N_Shore                   | TSS1500                 | STAD                        | -0.389 | < 0.001 |
|                  |                       |                           |                         | LUAD                        | -0.510 | < 0.001 |
|                  |                       |                           |                         | KIRC                        | -0.446 | < 0.001 |
| <i>ADAM32</i>    | cg22848598            | CpG island                | TSS200                  | UCEC                        | -0.283 | < 0.001 |
| <i>ADCY5</i>     | cg04138502            | CpG island                | TSS200                  | STAD                        | -0.254 | < 0.001 |
|                  |                       |                           |                         | LUAD                        | -0.308 | < 0.001 |
|                  |                       |                           |                         | LIHC                        | -0.315 | < 0.001 |
| <i>ADIPOR1</i>   | cg17218466            | S_Shore                   | TSS1500                 | KIRC                        | -0.493 | < 0.001 |
|                  |                       |                           |                         | STAD                        | -0.362 | < 0.001 |
|                  |                       |                           |                         | LUAD                        | -0.384 | < 0.001 |
|                  |                       |                           |                         | UCEC                        | -0.305 | < 0.001 |
|                  |                       |                           |                         |                             |        |         |
|                  |                       |                           |                         |                             |        |         |
| <i>AGXT2L2</i>   | cg20721320            | S_Shore                   | TSS1500                 | KIRC                        | -0.260 | < 0.001 |
| <i>AKAP8L</i>    | cg13640414            | S_Shore                   | TSS1500                 | LIHC                        | -0.276 | < 0.001 |
|                  |                       |                           |                         | UCEC                        | -0.289 | < 0.001 |
|                  |                       |                           |                         | LIHC                        | -0.271 | < 0.001 |
|                  |                       |                           |                         |                             |        |         |
|                  |                       |                           |                         |                             |        |         |
| <i>ALDH1L2</i>   | cg16204509            | S_Shore                   | TSS1500                 | LUAD                        | -0.252 | < 0.001 |
| <i>ALS2CR11</i>  | cg11052143            | S_Shore                   | TSS200                  | STAD                        | -0.423 | < 0.001 |
|                  |                       |                           |                         | LUAD                        | -0.401 | < 0.001 |
|                  |                       |                           |                         | LIHC                        | -0.339 | < 0.001 |
|                  |                       |                           |                         | UCEC                        | -0.342 | < 0.001 |
|                  |                       |                           |                         |                             |        |         |
|                  |                       |                           |                         |                             |        |         |
| <i>AMPD3</i>     | cg07329251            | S_Shelf                   | TSS200                  | LUAD                        | -0.294 | < 0.001 |
|                  |                       |                           |                         | KIRC                        | -0.438 | < 0.001 |
| <i>ANK1</i>      | cg19132462            | S_Shelf                   | TSS200                  | KIRC                        | -0.483 | < 0.001 |
|                  |                       |                           |                         | KIRC                        | -0.455 | < 0.001 |
|                  |                       |                           |                         | KIRC                        | -0.360 | < 0.001 |
|                  |                       |                           |                         | KIRC                        | -0.355 | < 0.001 |
|                  |                       |                           |                         | KIRC                        | -0.355 | < 0.001 |
| <i>ANKRD40</i>   | cg20807852            | S_Shore                   | TSS1500                 | UCEC                        | -0.398 | < 0.001 |
| <i>ARHGAP9</i>   | cg08339023            | S_Shelf                   | TSS200                  | STAD                        | -0.263 | < 0.001 |
|                  |                       |                           |                         | LUAD                        | -0.402 | < 0.001 |
|                  |                       |                           |                         | KIRC                        | -0.427 | < 0.001 |
|                  |                       |                           |                         | KIRC                        | -0.365 | < 0.001 |
|                  |                       |                           |                         |                             |        |         |
| <i>ASCL2</i>     | cg05309948            | CpG island                | TSS1500                 | LUAD                        | -0.259 | < 0.001 |
| <i>ATG16L1</i>   | cg23339656            | N_Shore                   | TSS1500                 | KIRC                        | -0.265 | < 0.001 |
| <i>B3GNT3</i>    | cg23771661            | N_Shore                   | TSS1500                 | STAD                        | -0.365 | < 0.001 |
| <i>BIRC7</i>     | cg22843950            | N_Shelf                   | TSS200                  | KIRC                        | -0.375 | < 0.001 |
| <i>BRD1</i>      | cg16001335            | N_Shore; N_Shore; S_Shelf | TSS1500                 | LUAD                        | -0.372 | < 0.001 |
| <i>C10orf72</i>  | cg06484553            | S_Shore                   | TSS1500                 | KIRC                        | -0.289 | < 0.001 |
|                  |                       |                           |                         | KIRC                        | -0.267 | < 0.001 |
| <i>C14orf180</i> | cg02868468            | S_Shelf                   | TSS1500                 | KIRC                        | -0.310 | < 0.001 |
| <i>C14orf73</i>  | cg09380688            | N_Shelf                   | TSS200                  | LIHC                        | -0.612 | < 0.001 |
| <i>C17orf101</i> | cg24998110            | S_Shelf; S_Shore          | TSS1500                 | KIRC                        | -0.264 | < 0.001 |
| <i>C17orf104</i> | cg08496953            | CpG island                | TSS1500                 | STAD                        | -0.341 | < 0.001 |
|                  |                       |                           |                         | LUAD                        | -0.264 | < 0.001 |
|                  |                       |                           |                         | UCEC                        | -0.269 | < 0.001 |
|                  |                       |                           |                         | STAD                        | -0.339 | < 0.001 |
|                  |                       |                           |                         | LUAD                        | -0.268 | < 0.001 |
|                  |                       |                           |                         | UCEC                        | -0.279 | < 0.001 |
| <i>C1orf200</i>  | cg12354861            | S_Shore                   | TSS200                  | KIRC                        | -0.464 | < 0.001 |
| <i>C1orf66</i>   | cg02833725            | N_Shore                   | TSS1500                 | STAD                        | -0.295 | < 0.001 |
| <i>C1orf70</i>   | cg15487867            | S_Shelf; N_Shore; S_Shore | TSS200                  | STAD                        | -0.360 | < 0.001 |
|                  |                       |                           |                         | UCEC                        | -0.386 | < 0.001 |
| <i>C8orf38</i>   | cg27127492            | N_Shore                   | TSS1500                 | LUAD                        | -0.320 | < 0.001 |
|                  |                       |                           |                         | LIHC                        | -0.347 | < 0.001 |

|                |            |                  |         |      |        |        |
|----------------|------------|------------------|---------|------|--------|--------|
| <i>C8orf84</i> | cg19518093 | S_Shore          | TSS1500 | UCEC | -0.331 | <0.001 |
| <i>CACNA1B</i> | cg05863502 | CpG island       | TSS1500 | UCEC | -0.269 | <0.001 |
| <i>CAD</i>     | cg09947274 | N_Shore          | TSS1500 | LUAD | -0.290 | <0.001 |
|                |            |                  |         | LIHC | -0.404 | <0.001 |
|                |            |                  |         | KIRC | -0.368 | <0.001 |
| <i>CARD14</i>  | cg06209035 | N_Shelf          | TSS200  | STAD | -0.296 | <0.001 |
|                |            |                  |         | LUAD | -0.501 | <0.001 |
|                |            |                  |         | KIRC | -0.357 | <0.001 |
| <i>CARNS1</i>  | cg25414605 | N_Shore          | TSS1500 | UCEC | -0.329 | <0.001 |
| <i>CCDC24</i>  | cg22816909 | N_Shore          | TSS1500 | STAD | -0.277 | <0.001 |
|                |            |                  |         | LUAD | -0.291 | <0.001 |
| <i>CCHCR1</i>  | cg24876187 | S_Shore          | TSS1500 | LIHC | -0.261 | <0.001 |
|                |            |                  |         | KIRC | -0.253 | <0.001 |
|                | cg23238834 | S_Shore          | TSS1500 | KIRC | -0.271 | <0.001 |
| <i>CD274</i>   | cg15837913 | N_Shore          | TSS1500 | UCEC | -0.254 | <0.001 |
| <i>CD44</i>    | cg20971158 | N_Shore          | TSS1500 | KIRC | -0.263 | <0.001 |
| <i>CDKL2</i>   | cg03757145 | CpG island       | TSS200  | UCEC | -0.283 | <0.001 |
|                | cg14263942 | CpG island       | TSS200  | UCEC | -0.282 | <0.001 |
| <i>CHMP4C</i>  | cg07583137 | N_Shore          | TSS1500 | STAD | -0.569 | <0.001 |
|                |            |                  |         | LUAD | -0.471 | <0.001 |
|                |            |                  |         | LIHC | -0.390 | <0.001 |
|                |            |                  |         | KIRC | -0.306 | <0.001 |
|                |            |                  |         | UCEC | -0.456 | <0.001 |
| <i>CIITA</i>   | cg08985333 | N_Shore          | TSS200  | STAD | -0.276 | <0.001 |
|                |            |                  |         | KIRC | -0.314 | <0.001 |
| <i>CKLF</i>    | cg08793208 | N_Shore; S_Shore | TSS1500 | LIHC | -0.355 | <0.001 |
| <i>CLDN4</i>   | cg14826417 | N_Shore          | TSS1500 | STAD | -0.447 | <0.001 |
|                |            |                  |         | LUAD | -0.350 | <0.001 |
|                |            |                  |         | LIHC | -0.251 | <0.001 |
|                |            |                  |         | KIRC | -0.289 | <0.001 |
|                |            |                  |         | UCEC | -0.452 | <0.001 |
| <i>CMTM2</i>   | cg05546863 | CpG island       | TSS200  | LUAD | -0.368 | <0.001 |
|                | cg07153665 | CpG island       | TSS200  | LUAD | -0.362 | <0.001 |
| <i>CMTM4</i>   | cg02420395 | S_Shore          | TSS1500 | KIRC | -0.336 | <0.001 |
| <i>CNO</i>     | cg20644952 | N_Shore          | TSS1500 | STAD | -0.301 | <0.001 |
|                |            |                  |         | LUAD | -0.408 | <0.001 |
| <i>COX10</i>   | cg20170777 | N_Shore          | TSS1500 | STAD | -0.262 | <0.001 |
|                |            |                  |         | LUAD | -0.302 | <0.001 |
| <i>COX8C</i>   | cg21149595 | CpG island       | TSS200  | UCEC | -0.317 | <0.001 |
| <i>DBF4</i>    | cg04330806 | N_Shore          | TSS1500 | STAD | -0.259 | <0.001 |
|                |            |                  |         | LIHC | -0.307 | <0.001 |
|                |            |                  |         | UCEC | -0.315 | <0.001 |
| <i>DBNDD1</i>  | cg02872476 | N_Shelf; S_Shore | TSS1500 | STAD | -0.475 | <0.001 |
|                |            |                  |         | LUAD | -0.477 | <0.001 |
|                |            |                  |         | LIHC | -0.511 | <0.001 |
|                |            |                  |         | KIRC | -0.397 | <0.001 |
|                |            |                  |         | UCEC | -0.589 | <0.001 |
| <i>DCAF4L2</i> | cg02310286 | CpG island       | TSS200  | STAD | -0.337 | <0.001 |
|                |            |                  |         | LUAD | -0.277 | <0.001 |
|                |            |                  |         | LIHC | -0.435 | <0.001 |
|                |            |                  |         | KIRC | -0.495 | <0.001 |
|                |            |                  |         | UCEC | -0.386 | <0.001 |
|                | cg21181391 | CpG island       | TSS200  | STAD | -0.255 | <0.001 |
|                |            |                  |         | LIHC | -0.374 | <0.001 |
|                |            |                  |         | KIRC | -0.572 | <0.001 |
|                |            |                  |         | UCEC | -0.344 | <0.001 |
|                | cg17703554 | CpG island       | TSS200  | LIHC | -0.394 | <0.001 |
|                |            |                  |         | KIRC | -0.575 | <0.001 |

|                  |            |                                  |         |      |        |         |
|------------------|------------|----------------------------------|---------|------|--------|---------|
|                  |            |                                  |         | UCEC | -0.273 | < 0.001 |
| <i>DERL1</i>     | cg21139496 | S_Shore                          | TSS1500 | UCEC | -0.253 | < 0.001 |
| <i>DNASE2</i>    | cg15503081 | N_Shelf; S_Shore                 | TSS1500 | KIRC | -0.495 | < 0.001 |
|                  |            |                                  |         | UCEC | -0.309 | < 0.001 |
| <i>DYDC1</i>     | cg12640394 | CpG island                       | TSS200  | LIHC | -0.255 | < 0.001 |
| <i>E2F6</i>      | cg23214755 | S_Shore                          | TSS1500 | LUAD | -0.391 | < 0.001 |
|                  | cg17726575 | S_Shore                          | TSS1500 | LIHC | -0.324 | < 0.001 |
|                  |            |                                  |         | LUAD | -0.446 | < 0.001 |
|                  |            |                                  |         | LIHC | -0.314 | < 0.001 |
| <i>EHBP1L1</i>   | cg14189782 | Shore; S_Shelf; CpG island; N_Sh | TSS1500 | KIRC | -0.411 | < 0.001 |
| <i>EPHX3</i>     | cg26010734 | S_Shore; N_Shore                 | TSS200  | STAD | -0.351 | < 0.001 |
|                  |            |                                  |         | LUAD | -0.313 | < 0.001 |
|                  |            |                                  |         | LIHC | -0.286 | < 0.001 |
|                  |            |                                  |         | KIRC | -0.257 | < 0.001 |
|                  | cg18366919 | S_Shore; CpG island              | TSS1500 | UCEC | -0.360 | < 0.001 |
|                  |            |                                  |         | STAD | -0.346 | < 0.001 |
|                  |            |                                  |         | LUAD | -0.347 | < 0.001 |
|                  |            |                                  |         | LIHC | -0.282 | < 0.001 |
|                  |            |                                  |         | KIRC | -0.275 | < 0.001 |
|                  |            |                                  |         | UCEC | -0.370 | < 0.001 |
| <i>FAM110A</i>   | cg01687401 | S_Shelf; N_Shore                 | TSS1500 | UCEC | -0.304 | < 0.001 |
| <i>FAM111A</i>   | cg15723195 | S_Shore                          | TSS1500 | STAD | -0.399 | < 0.001 |
|                  |            |                                  |         | LIHC | -0.316 | < 0.001 |
|                  |            |                                  |         | UCEC | -0.304 | < 0.001 |
| <i>FAM164C</i>   | cg00327772 | N_Shore                          | TSS1500 | STAD | -0.287 | < 0.001 |
|                  |            |                                  |         | KIRC | -0.449 | < 0.001 |
| <i>FCHO1</i>     | cg11737334 | S_Shelf                          | TSS200  | KIRC | -0.348 | < 0.001 |
| <i>FLJ43663</i>  | cg05632420 | S_Shore; N_Shore                 | TSS200  | STAD | -0.274 | < 0.001 |
|                  |            |                                  |         | LUAD | -0.315 | < 0.001 |
| <i>FZD6</i>      | cg09020649 | N_Shore                          | TSS200  | LUAD | -0.269 | < 0.001 |
|                  |            |                                  |         | UCEC | -0.327 | < 0.001 |
| <i>GALNT14</i>   | cg18624059 | S_Shore                          | TSS1500 | KIRC | -0.286 | < 0.001 |
| <i>GGCT</i>      | cg21491201 | S_Shore                          | TSS1500 | STAD | -0.274 | < 0.001 |
|                  |            |                                  |         | LUAD | -0.351 | < 0.001 |
|                  |            |                                  |         | LIHC | -0.262 | < 0.001 |
|                  |            |                                  |         | KIRC | -0.290 | < 0.001 |
| <i>GON4L</i>     | cg00504075 | N_Shore; N_Shelf                 | TSS1500 | LUAD | -0.294 | < 0.001 |
|                  |            |                                  |         | LIHC | -0.270 | < 0.001 |
| <i>H1FO</i>      | cg15006681 | N_Shelf; N_Shore                 | TSS1500 | STAD | -0.334 | < 0.001 |
|                  |            |                                  |         | LUAD | -0.368 | < 0.001 |
|                  |            |                                  |         | LIHC | -0.440 | < 0.001 |
|                  |            |                                  |         | UCEC | -0.318 | < 0.001 |
| <i>HDAC11</i>    | cg19779799 | CpG island; N_Shore              | TSS1500 | STAD | -0.275 | < 0.001 |
|                  | cg05987698 | CpG island; N_Shore              | TSS1500 | STAD | -0.250 | < 0.001 |
| <i>HIST1H2BH</i> | cg02578368 | CpG island; N_Shore; S_Shelf     | TSS1500 | STAD | -0.324 | < 0.001 |
|                  |            |                                  |         | LUAD | -0.265 | < 0.001 |
| <i>HIST1H3H</i>  | cg01330280 | N_Shore; S_Shore                 | TSS1500 | UCEC | -0.268 | < 0.001 |
| <i>HK2</i>       | cg05595692 | N_Shore                          | TSS1500 | KIRC | -0.424 | < 0.001 |
| <i>HMG2</i>      | cg27425314 | N_Shore                          | TSS1500 | LIHC | -0.259 | < 0.001 |
| <i>HNRNPF</i>    | cg08343600 | S_Shore                          | TSS1500 | STAD | -0.522 | < 0.001 |
|                  |            |                                  |         | LUAD | -0.452 | < 0.001 |
|                  |            |                                  |         | UCEC | -0.417 | < 0.001 |
| <i>HOXA10</i>    | cg14188840 | N_Shelf; S_Shore                 | TSS1500 | STAD | -0.612 | < 0.001 |
|                  | cg14625175 | CpG island                       | TSS200  | UCEC | -0.678 | < 0.001 |
|                  |            |                                  |         | STAD | -0.454 | < 0.001 |
|                  |            |                                  |         | KIRC | -0.279 | < 0.001 |
|                  |            |                                  |         | UCEC | -0.427 | < 0.001 |
| <i>HOXA4</i>     | cg16651126 | CpG island                       | TSS200  | STAD | -0.302 | < 0.001 |

|                     |            |                     |         |      |        |        |
|---------------------|------------|---------------------|---------|------|--------|--------|
|                     |            |                     |         | LUAD | -0.315 | <0.001 |
|                     |            |                     |         | LIHC | -0.412 | <0.001 |
|                     |            |                     |         | UCEC | -0.409 | <0.001 |
|                     | cg11015251 | CpG island          | TSS200  | STAD | -0.281 | <0.001 |
|                     |            |                     |         | LUAD | -0.327 | <0.001 |
|                     |            |                     |         | LIHC | -0.422 | <0.001 |
|                     |            |                     |         | UCEC | -0.410 | <0.001 |
| <i>HOXD8</i>        | cg14473102 | S_Shore; CpG island | TSS200  | STAD | -0.429 | <0.001 |
|                     |            |                     |         | LUAD | -0.297 | <0.001 |
|                     |            |                     |         | KIRC | -0.256 | <0.001 |
|                     |            |                     |         | UCEC | -0.254 | <0.001 |
| <i>HTATIP2</i>      | cg18788940 | N_Shore             | TSS200  | STAD | -0.429 | <0.001 |
|                     |            |                     |         | LIHC | -0.395 | <0.001 |
|                     |            |                     |         | KIRC | -0.423 | <0.001 |
|                     |            |                     |         | UCEC | -0.305 | <0.001 |
| <i>IER5</i>         | cg02661372 | N_Shore             | TSS1500 | LUAD | -0.275 | <0.001 |
| <i>INA</i>          | cg23642747 | CpG island          | TSS1500 | LUAD | -0.261 | <0.001 |
|                     |            |                     |         | UCEC | -0.305 | <0.001 |
| <i>INPP5D</i>       | cg06272010 | N_Shore             | TSS1500 | STAD | -0.488 | <0.001 |
|                     |            |                     |         | LUAD | -0.473 | <0.001 |
|                     |            |                     |         | KIRC | -0.477 | <0.001 |
|                     |            |                     |         | UCEC | -0.474 | <0.001 |
|                     | cg02935132 | N_Shore             | TSS1500 | STAD | -0.487 | <0.001 |
|                     |            |                     |         | LUAD | -0.430 | <0.001 |
|                     |            |                     |         | KIRC | -0.376 | <0.001 |
|                     |            |                     |         | UCEC | -0.457 | <0.001 |
|                     | cg00438740 | N_Shore             | TSS200  | STAD | -0.496 | <0.001 |
|                     |            |                     |         | LUAD | -0.406 | <0.001 |
|                     |            |                     |         | KIRC | -0.258 | <0.001 |
|                     |            |                     |         | UCEC | -0.473 | <0.001 |
|                     | cg02788013 | N_Shore             | TSS200  | STAD | -0.391 | <0.001 |
|                     |            |                     |         | LUAD | -0.326 | <0.001 |
|                     |            |                     |         | UCEC | -0.280 | <0.001 |
| <i>ITGA4</i>        | cg05246303 | N_Shore             | TSS1500 | STAD | -0.273 | <0.001 |
| <i>ITGA6</i>        | cg20795401 | N_Shore             | TSS1500 | STAD | -0.286 | <0.001 |
| <i>ITGA7</i>        | cg25814752 | N_Shelf             | TSS1500 | LIHC | -0.332 | <0.001 |
|                     |            |                     |         | KIRC | -0.296 | <0.001 |
| <i>KCNK9</i>        | cg21415530 | CpG island          | TSS1500 | KIRC | -0.257 | <0.001 |
|                     |            |                     |         | UCEC | -0.263 | <0.001 |
| <i>KRT19</i>        | cg12491114 | S_Shore             | TSS1500 | STAD | -0.372 | <0.001 |
|                     |            |                     |         | KIRC | -0.522 | <0.001 |
|                     | cg03550233 | S_Shore             | TSS1500 | STAD | -0.297 | <0.001 |
|                     |            |                     |         | KIRC | -0.440 | <0.001 |
| <i>L3MBTL</i>       | cg22330467 | N_Shore             | TSS200  | LUAD | -0.319 | <0.001 |
| <i>LAG3</i>         | cg04153135 | N_Shore             | TSS1500 | LUAD | -0.274 | <0.001 |
| <i>LFNG</i>         | cg05829046 | N_Shore             | TSS200  | KIRC | -0.322 | <0.001 |
|                     | cg12497581 | N_Shore             | TSS1500 | KIRC | -0.251 | <0.001 |
| <i>LOC100133545</i> | cg07397493 | N_Shelf             | TSS200  | LIHC | -0.295 | <0.001 |
|                     | cg08273750 | N_Shelf             | TSS200  | LIHC | -0.255 | <0.001 |
| <i>LOC387647</i>    | cg11515215 | N_Shore             | TSS1500 | LIHC | -0.327 | <0.001 |
| <i>LOC441601</i>    | cg25318278 | S_Shore             | TSS200  | LUAD | -0.262 | <0.001 |
|                     |            |                     |         | LIHC | -0.295 | <0.001 |
| <i>LRRK1</i>        | cg25331703 | CpG island          | TSS200  | UCEC | -0.295 | <0.001 |
| <i>LRRN1</i>        | cg04426311 | CpG island          | TSS200  | STAD | -0.336 | <0.001 |
| <i>LTB</i>          | cg13335388 | S_Shore             | TSS200  | UCEC | -0.358 | <0.001 |
| <i>LUC7L3</i>       | cg04604142 | N_Shore             | TSS1500 | LUAD | -0.289 | <0.001 |
|                     |            |                     |         | LIHC | -0.252 | <0.001 |
| <i>LYNX1</i>        | cg23180489 | S_Shore             | TSS200  | LUAD | -0.350 | <0.001 |

|                   |            |                     |         |      |        |        |
|-------------------|------------|---------------------|---------|------|--------|--------|
|                   | cg19021188 | S_Shore             | TSS200  | LUAD | -0.406 | <0.001 |
|                   | cg08090164 | S_Shore             | TSS200  | LUAD | -0.408 | <0.001 |
| <i>LYPD1</i>      | cg20273260 | S_Shore             | TSS200  | LIHC | -0.271 | <0.001 |
| <i>MAP6D1</i>     | cg10347032 | CpG island          | TSS1500 | STAD | -0.269 | <0.001 |
| <i>MAPK13</i>     | cg05859264 | N_Shore             | TSS1500 | STAD | -0.510 | <0.001 |
|                   |            |                     |         | LUAD | -0.328 | <0.001 |
|                   |            |                     |         | LIHC | -0.377 | <0.001 |
|                   |            |                     |         | KIRC | -0.418 | <0.001 |
|                   |            |                     |         | UCEC | -0.465 | <0.001 |
| <i>MELK</i>       | cg14279528 | N_Shore             | TSS1500 | STAD | -0.332 | <0.001 |
|                   |            |                     |         | LIHC | -0.336 | <0.001 |
|                   |            |                     |         | UCEC | -0.257 | <0.001 |
| <i>MEST</i>       | cg20148994 | N_Shore             | TSS1500 | STAD | -0.414 | <0.001 |
|                   |            |                     |         | LUAD | -0.520 | <0.001 |
|                   | cg22115706 | N_Shore             | TSS1500 | STAD | -0.387 | <0.001 |
|                   |            |                     |         | LUAD | -0.456 | <0.001 |
|                   | cg07683330 | N_Shore             | TSS1500 | STAD | -0.369 | <0.001 |
|                   |            |                     |         | LUAD | -0.472 | <0.001 |
| <i>MICB</i>       | cg08009669 | N_Shore; S_Shelf    | TSS1500 | LIHC | -0.322 | <0.001 |
|                   | cg20240154 | N_Shore; S_Shelf    | TSS1500 | LIHC | -0.274 | <0.001 |
|                   |            |                     |         | KIRC | -0.338 | <0.001 |
| <i>MOV10L1</i>    | cg10828284 | N_Shore; CpG island | TSS200  | STAD | -0.474 | <0.001 |
|                   |            |                     |         | UCEC | -0.456 | <0.001 |
| <i>MPV17L</i>     | cg09294492 | N_Shore             | TSS1500 | STAD | -0.304 | <0.001 |
| <i>MRPS36</i>     | cg15556672 | N_Shore             | TSS1500 | LUAD | -0.257 | <0.001 |
| <i>MTMR7</i>      | cg12296772 | CpG island          | TSS200  | UCEC | -0.361 | <0.001 |
| <i>MYO19</i>      | cg02097479 | S_Shore             | TSS1500 | STAD | -0.402 | <0.001 |
|                   |            |                     |         | LUAD | -0.374 | <0.001 |
|                   |            |                     |         | LIHC | -0.261 | <0.001 |
|                   |            |                     |         | UCEC | -0.357 | <0.001 |
| <i>MYO5C</i>      | cg27633342 | S_Shore             | TSS1500 | STAD | -0.362 | <0.001 |
|                   |            |                     |         | LUAD | -0.338 | <0.001 |
|                   |            |                     |         | LIHC | -0.365 | <0.001 |
|                   |            |                     |         | UCEC | -0.306 | <0.001 |
| <i>NCALD</i>      | cg19308132 | S_Shore             | TSS1500 | LUAD | -0.359 | <0.001 |
|                   |            |                     |         | UCEC | -0.443 | <0.001 |
| <i>NCAPH</i>      | cg03913456 | N_Shore             | TSS1500 | STAD | -0.274 | <0.001 |
| <i>NCOA6</i>      | cg17129400 | S_Shore             | TSS1500 | STAD | -0.496 | <0.001 |
|                   |            |                     |         | LUAD | -0.318 | <0.001 |
|                   |            |                     |         | UCEC | -0.322 | <0.001 |
|                   | cg10743062 | S_Shore             | TSS1500 | STAD | -0.473 | <0.001 |
|                   |            |                     |         | LUAD | -0.351 | <0.001 |
|                   |            |                     |         | LIHC | -0.274 | <0.001 |
|                   |            |                     |         | UCEC | -0.302 | <0.001 |
| <i>NCRNA00200</i> | cg00666074 | N_Shore             | TSS1500 | STAD | -0.308 | <0.001 |
| <i>NEFM</i>       | cg17078116 | CpG island          | TSS200  | STAD | -0.432 | <0.001 |
|                   |            |                     |         | LIHC | -0.254 | <0.001 |
|                   |            |                     |         | UCEC | -0.475 | <0.001 |
| <i>NOX4</i>       | cg19981409 | S_Shore             | TSS1500 | LUAD | -0.287 | <0.001 |
| <i>NRNIL</i>      | cg10574499 | CpG island          | TSS200  | LUAD | -0.325 | <0.001 |
|                   | cg09756419 | CpG island          | TSS200  | LUAD | -0.310 | <0.001 |
|                   | cg01068601 | CpG island          | TSS200  | LUAD | -0.287 | <0.001 |
|                   | cg02308079 | CpG island          | TSS200  | LUAD | -0.278 | <0.001 |
| <i>ODZ4</i>       | cg00908927 | S_Shore             | TSS1500 | KIRC | -0.333 | <0.001 |
| <i>PARD6B</i>     | cg03812837 | N_Shore             | TSS1500 | STAD | -0.386 | <0.001 |
|                   |            |                     |         | KIRC | -0.398 | <0.001 |
|                   |            |                     |         | UCEC | -0.380 | <0.001 |
| <i>PARP9</i>      | cg24087515 | S_Shore             | TSS1500 | UCEC | -0.430 | <0.001 |

|                 |            |                                  |         |      |        |         |
|-----------------|------------|----------------------------------|---------|------|--------|---------|
| <i>PCDHB8</i>   | cg09052108 | S_Shelf; N_Shore                 | TSS200  | STAD | -0.378 | < 0.001 |
|                 |            |                                  |         | LUAD | -0.337 | < 0.001 |
|                 |            |                                  |         | KIRC | -0.454 | < 0.001 |
|                 |            |                                  |         | UCEC | -0.442 | < 0.001 |
| <i>PCDHGA11</i> | cg13951490 | Shore; N_Shore; N_Shelf; CpG isl | TSS1500 | STAD | -0.418 | < 0.001 |
|                 |            |                                  |         | UCEC | -0.515 | < 0.001 |
| <i>PFDN6</i>    | cg27355501 | N_Shore                          | TSS1500 | STAD | -0.252 | < 0.001 |
|                 |            |                                  |         | LIHC | -0.252 | < 0.001 |
| <i>PGAP2</i>    | cg19654882 | N_Shore                          | TSS200  | UCEC | -0.275 | < 0.001 |
| <i>PIK3CG</i>   | cg24384195 | N_Shelf                          | TSS1500 | STAD | -0.426 | < 0.001 |
|                 |            |                                  |         | LUAD | -0.338 | < 0.001 |
|                 |            |                                  |         | KIRC | -0.337 | < 0.001 |
|                 |            |                                  |         | UCEC | -0.294 | < 0.001 |
|                 | cg13214190 | N_Shelf                          | TSS200  | LUAD | -0.338 | < 0.001 |
|                 |            |                                  |         | KIRC | -0.339 | < 0.001 |
|                 |            |                                  |         | UCEC | -0.329 | < 0.001 |
|                 | cg11982525 | N_Shelf                          | TSS1500 | LUAD | -0.290 | < 0.001 |
| <i>PLEKHNI</i>  | cg12663811 | CpG island                       | TSS200  | LIHC | -0.346 | < 0.001 |
|                 |            |                                  |         | KIRC | -0.313 | < 0.001 |
|                 |            |                                  |         | UCEC | -0.380 | < 0.001 |
| <i>PLLIP</i>    | cg10343787 | S_Shore                          | TSS1500 | LUAD | -0.266 | < 0.001 |
| <i>PMEPA1</i>   | cg08082355 | S_Shore                          | TSS1500 | STAD | -0.321 | < 0.001 |
|                 |            |                                  |         | KIRC | -0.494 | < 0.001 |
|                 |            |                                  |         | STAD | -0.299 | < 0.001 |
|                 |            |                                  |         | KIRC | -0.478 | < 0.001 |
|                 | cg20208990 | S_Shore                          | TSS1500 | STAD | -0.299 | < 0.001 |
|                 |            |                                  |         | KIRC | -0.478 | < 0.001 |
|                 | cg07143805 | S_Shore                          | TSS200  | KIRC | -0.379 | < 0.001 |
| <i>PNMAL1</i>   | cg14750269 | S_Shore                          | TSS1500 | LUAD | -0.416 | < 0.001 |
|                 |            |                                  |         | UCEC | -0.342 | < 0.001 |
| <i>PPP1R14A</i> | cg02571816 | CpG island                       | TSS200  | STAD | -0.305 | < 0.001 |
|                 |            |                                  |         | LUAD | -0.347 | < 0.001 |
|                 |            |                                  |         | LIHC | -0.299 | < 0.001 |
|                 |            |                                  |         | STAD | -0.304 | < 0.001 |
|                 | cg09515953 | CpG island                       | TSS200  | LUAD | -0.344 | < 0.001 |
|                 | cg22557662 | CpG island                       | TSS200  | STAD | -0.299 | < 0.001 |
|                 |            |                                  |         | LUAD | -0.324 | < 0.001 |
| <i>PPP2R3A</i>  | cg07038400 | N_Shore                          | TSS1500 | STAD | -0.302 | < 0.001 |
|                 |            |                                  |         | LIHC | -0.300 | < 0.001 |
|                 |            |                                  |         | STAD | -0.300 | < 0.001 |
|                 | cg23194766 | N_Shore                          | TSS1500 | STAD | -0.300 | < 0.001 |
|                 | cg04907151 | N_Shore                          | TSS1500 | STAD | -0.294 | < 0.001 |
| <i>PRAME</i>    | cg22871485 | S_Shore                          | TSS200  | LIHC | -0.268 | < 0.001 |
|                 |            |                                  |         | STAD | -0.303 | < 0.001 |
|                 |            |                                  |         | LUAD | -0.390 | < 0.001 |
|                 |            |                                  |         | LIHC | -0.255 | < 0.001 |
|                 |            |                                  |         | KIRC | -0.351 | < 0.001 |
|                 |            |                                  |         | UCEC | -0.522 | < 0.001 |
|                 | cg00372774 | S_Shore                          | TSS1500 | UCEC | -0.520 | < 0.001 |
| <i>PRCI</i>     | cg01407062 | S_Shore                          | TSS1500 | STAD | -0.497 | < 0.001 |
|                 |            |                                  |         | LUAD | -0.370 | < 0.001 |
|                 |            |                                  |         | LIHC | -0.418 | < 0.001 |
|                 |            |                                  |         | UCEC | -0.406 | < 0.001 |
|                 | cg23059461 | S_Shelf                          | TSS200  | LUAD | -0.271 | < 0.001 |
|                 |            |                                  |         | KIRC | -0.513 | < 0.001 |
|                 | cg12336290 | S_Shelf                          | TSS200  | LUAD | -0.256 | < 0.001 |
|                 |            |                                  |         | KIRC | -0.403 | < 0.001 |
| <i>PRR16</i>    | cg06526721 | N_Shore; N_Shore                 | TSS1500 | KIRC | -0.250 | < 0.001 |
|                 |            |                                  |         | UCEC | -0.260 | < 0.001 |
|                 | cg08981702 | N_Shore; N_Shore                 | TSS1500 | UCEC | -0.260 | < 0.001 |
| <i>PSMA8</i>    | cg11858305 | N_Shore                          | TSS1500 | LUAD | -0.272 | < 0.001 |
| <i>PSMD2</i>    | cg06306006 | S_Shore                          | TSS200  | LUAD | -0.288 | < 0.001 |

|                |            |                  |         |      |        |         |
|----------------|------------|------------------|---------|------|--------|---------|
|                |            |                  |         | UCEC | -0.440 | < 0.001 |
| <i>PSMD6</i>   | cg01808508 | S_Shore          | TSS1500 | UCEC | -0.311 | < 0.001 |
| <i>PTCH1</i>   | cg26878949 | CpG island       | TSS1500 | KIRC | -0.412 | < 0.001 |
| <i>RAB15</i>   | cg14944269 | S_Shore          | TSS1500 | STAD | -0.392 | < 0.001 |
|                |            |                  |         | LUAD | -0.255 | < 0.001 |
| <i>RAP1GAP</i> | cg17184245 | S_Shore; S_Shore | TSS1500 | LUAD | -0.334 | < 0.001 |
| <i>RASSF10</i> | cg08876434 | CpG island       | TSS1500 | STAD | -0.323 | < 0.001 |
|                | cg05095158 | CpG island       | TSS200  | STAD | -0.289 | < 0.001 |
| <i>RBM24</i>   | cg15168816 | S_Shore          | TSS1500 | STAD | -0.259 | < 0.001 |
|                |            |                  |         | LIHC | -0.340 | < 0.001 |
|                |            |                  |         | KIRC | -0.278 | < 0.001 |
| <i>RCCI</i>    | cg25596287 | N_Shore          | TSS1500 | STAD | -0.318 | < 0.001 |
|                |            |                  |         | LUAD | -0.277 | < 0.001 |
|                |            |                  |         | LIHC | -0.257 | < 0.001 |
|                |            |                  |         | KIRC | -0.379 | < 0.001 |
|                |            |                  |         | UCEC | -0.266 | < 0.001 |
| <i>RHOA</i>    | cg03145930 | N_Shore          | TSS1500 | LUAD | -0.279 | < 0.001 |
| <i>RIMS2</i>   | cg20129213 | CpG island       | TSS1500 | LUAD | -0.252 | < 0.001 |
| <i>RINI</i>    | cg08995609 | S_Shore          | TSS200  | STAD | -0.395 | < 0.001 |
|                |            |                  |         | LUAD | -0.277 | < 0.001 |
|                |            |                  |         | LIHC | -0.255 | < 0.001 |
|                |            |                  |         | KIRC | -0.310 | < 0.001 |
|                |            |                  |         | UCEC | -0.291 | < 0.001 |
|                | cg14391855 | S_Shore          | TSS200  | LUAD | -0.279 | < 0.001 |
|                |            |                  |         | LIHC | -0.258 | < 0.001 |
|                |            |                  |         | KIRC | -0.373 | < 0.001 |
| <i>RIPK3</i>   | cg27599271 | S_Shore          | TSS200  | STAD | -0.382 | < 0.001 |
|                |            |                  |         | KIRC | -0.275 | < 0.001 |
|                |            |                  |         | UCEC | -0.492 | < 0.001 |
| <i>RNF212</i>  | cg23462514 | CpG island       | TSS1500 | STAD | -0.480 | < 0.001 |
|                |            |                  |         | LUAD | -0.424 | < 0.001 |
|                |            |                  |         | KIRC | -0.340 | < 0.001 |
|                |            |                  |         | UCEC | -0.412 | < 0.001 |
|                | cg12414557 | CpG island       | TSS200  | STAD | -0.392 | < 0.001 |
|                |            |                  |         | LUAD | -0.357 | < 0.001 |
|                |            |                  |         | KIRC | -0.284 | < 0.001 |
|                |            |                  |         | UCEC | -0.391 | < 0.001 |
| <i>RNF220</i>  | cg21578207 | N_Shore          | TSS1500 | LIHC | -0.296 | < 0.001 |
|                |            |                  |         | KIRC | -0.252 | < 0.001 |
| <i>RPS6KA1</i> | cg22512670 | N_Shore          | TSS1500 | STAD | -0.303 | < 0.001 |
|                |            |                  |         | UCEC | -0.461 | < 0.001 |
| <i>RRBP1</i>   | cg26447697 | S_Shore          | TSS1500 | STAD | -0.299 | < 0.001 |
| <i>S100A6</i>  | cg08106792 | S_Shore          | TSS1500 | STAD | -0.267 | < 0.001 |
|                |            |                  |         | KIRC | -0.411 | < 0.001 |
|                |            |                  |         | UCEC | -0.264 | < 0.001 |
| <i>SAAL1</i>   | cg05093315 | S_Shore          | TSS1500 | LIHC | -0.330 | < 0.001 |
|                |            |                  |         | KIRC | -0.254 | < 0.001 |
| <i>SALL3</i>   | cg05080154 | CpG island       | TSS1500 | KIRC | -0.254 | < 0.001 |
| <i>SAMD10</i>  | cg05929574 | N_Shore; S_Shore | TSS1500 | LIHC | -0.304 | < 0.001 |
|                |            |                  |         | UCEC | -0.305 | < 0.001 |
| <i>SAP18</i>   | cg23082003 | N_Shore          | TSS1500 | STAD | -0.329 | < 0.001 |
|                |            |                  |         | LUAD | -0.267 | < 0.001 |
| <i>SCLT1</i>   | cg05812836 | S_Shore          | TSS1500 | LIHC | -0.265 | < 0.001 |
| <i>SCN8A</i>   | cg18426142 | N_Shore          | TSS1500 | STAD | -0.276 | < 0.001 |
|                |            |                  |         | LUAD | -0.301 | < 0.001 |
|                |            |                  |         | UCEC | -0.295 | < 0.001 |
| <i>SDF2</i>    | cg07042338 | S_Shore          | TSS1500 | LIHC | -0.251 | < 0.001 |
| <i>SDR16C5</i> | cg05305140 | S_Shore          | TSS1500 | LUAD | -0.285 | < 0.001 |

|                   |            |                     |         |      |        |        |
|-------------------|------------|---------------------|---------|------|--------|--------|
|                   | cg18140857 | S_Shore             | TSS1500 | LUAD | -0.289 | <0.001 |
| <i>SEMA4F</i>     | cg26801943 | N_Shore             | TSS1500 | LIHC | -0.327 | <0.001 |
|                   |            |                     |         | KIRC | -0.264 | <0.001 |
|                   |            |                     |         | LIHC | -0.417 | <0.001 |
| <i>SFN</i>        | cg06720467 | N_Shore; N_Shore    | TSS200  | LIHC | -0.417 | <0.001 |
|                   | cg21950166 | N_Shore; N_Shore    | TSS1500 | LIHC | -0.461 | <0.001 |
| <i>SH3BP1</i>     | cg20170271 | N_Shore             | TSS1500 | STAD | -0.424 | <0.001 |
|                   |            |                     |         | KIRC | -0.449 | <0.001 |
|                   |            |                     |         | STAD | -0.301 | <0.001 |
| <i>SHE</i>        | cg18081940 | CpG island          | TSS1500 | KIRC | -0.301 | <0.001 |
|                   |            |                     |         | UCEC | -0.254 | <0.001 |
|                   |            |                     |         | LUAD | -0.254 | <0.001 |
| <i>SHPK</i>       | cg17342247 | S_Shore             | TSS1500 | LUAD | -0.254 | <0.001 |
| <i>SLC13A5</i>    | cg13545212 | CpG island          | TSS1500 | LIHC | -0.251 | <0.001 |
| <i>SLC16A1</i>    | cg26162147 | S_Shore; S_Shore    | TSS1500 | STAD | -0.253 | <0.001 |
|                   |            |                     |         | LUAD | -0.396 | <0.001 |
|                   |            |                     |         | KIRC | -0.319 | <0.001 |
|                   | cg07176692 | S_Shelf; S_Shore    | TSS1500 | UCEC | -0.581 | <0.001 |
|                   |            |                     |         | LUAD | -0.290 | <0.001 |
|                   |            |                     |         | KIRC | -0.351 | <0.001 |
|                   |            |                     |         | UCEC | -0.539 | <0.001 |
| <i>SLC22A18AS</i> | cg08999895 | S_Shelf             | TSS1500 | STAD | -0.358 | <0.001 |
|                   |            |                     |         | LIHC | -0.354 | <0.001 |
|                   |            |                     |         | LIHC | -0.381 | <0.001 |
| <i>SLC25A36</i>   | cg03586379 | CpG island          | TSS200  | LIHC | -0.381 | <0.001 |
| <i>SLC6A19</i>    | cg26711638 | N_Shore             | TSS1500 | KIRC | -0.277 | <0.001 |
|                   | cg21492882 | CpG island          | TSS200  | KIRC | -0.254 | <0.001 |
| <i>SLC6A20</i>    | cg13719314 | S_Shore             | TSS1500 | LUAD | -0.272 | <0.001 |
| <i>SLMO1</i>      | cg15262515 | N_Shore             | TSS1500 | LUAD | -0.344 | <0.001 |
| <i>SMYD5</i>      | cg01329511 | N_Shore             | TSS1500 | STAD | -0.318 | <0.001 |
|                   |            |                     |         | LUAD | -0.266 | <0.001 |
|                   |            |                     |         | LIHC | -0.435 | <0.001 |
| <i>SNRPD1</i>     | cg22215678 | N_Shore             | TSS1500 | STAD | -0.385 | <0.001 |
|                   |            |                     |         | LUAD | -0.336 | <0.001 |
|                   |            |                     |         | LIHC | -0.256 | <0.001 |
| <i>SORD</i>       | cg06424894 | N_Shore             | TSS1500 | UCEC | -0.272 | <0.001 |
| <i>SPAG6</i>      | cg18247055 | CpG island; S_Shelf | TSS200  | UCEC | -0.375 | <0.001 |
|                   | cg23016129 | CpG island; S_Shelf | TSS200  | UCEC | -0.346 | <0.001 |
|                   | cg12377139 | CpG island; S_Shelf | TSS200  | UCEC | -0.363 | <0.001 |
|                   |            |                     |         | UCEC | -0.363 | <0.001 |
| <i>SP11</i>       | cg03301240 | S_Shore             | TSS1500 | KIRC | -0.306 | <0.001 |
| <i>SPO11</i>      | cg13888886 | N_Shore             | TSS200  | LUAD | -0.281 | <0.001 |
| <i>SPSB2</i>      | cg09080114 | S_Shore             | TSS1500 | STAD | -0.257 | <0.001 |
|                   |            |                     |         | LIHC | -0.260 | <0.001 |
|                   |            |                     |         | STAD | -0.412 | <0.001 |
| <i>SSB</i>        | cg23497644 | N_Shore             | TSS1500 | LUAD | -0.302 | <0.001 |
| <i>STAG3</i>      | cg13210467 | CpG island          | TSS1500 | STAD | -0.336 | <0.001 |
|                   |            |                     |         | LUAD | -0.408 | <0.001 |
|                   |            |                     |         | UCEC | -0.313 | <0.001 |
|                   | cg04778012 | CpG island          | TSS1500 | STAD | -0.331 | <0.001 |
|                   |            |                     |         | LUAD | -0.395 | <0.001 |
|                   |            |                     |         | UCEC | -0.315 | <0.001 |
|                   | cg10084644 | CpG island          | TSS1500 | STAD | -0.294 | <0.001 |
|                   |            |                     |         | LUAD | -0.316 | <0.001 |
|                   |            |                     |         | UCEC | -0.277 | <0.001 |
| <i>STX6</i>       | cg15084269 | S_Shore; S_Shore    | TSS1500 | LIHC | -0.267 | <0.001 |
| <i>SUSD4</i>      | cg12307840 | CpG island          | TSS1500 | KIRC | -0.335 | <0.001 |
|                   | cg00172597 | CpG island          | TSS1500 | KIRC | -0.302 | <0.001 |
|                   | cg07605211 | CpG island          | TSS1500 | KIRC | -0.281 | <0.001 |
| <i>SYCE1</i>      | cg14239307 | N_Shelf; CpG island | TSS200  | STAD | -0.444 | <0.001 |
|                   |            |                     |         | LUAD | -0.348 | <0.001 |
|                   |            |                     |         | LIHC | -0.528 | <0.001 |



|                  |            |                           |         |      |        |         |
|------------------|------------|---------------------------|---------|------|--------|---------|
|                  |            |                           |         | KIRC | -0.290 | < 0.001 |
|                  |            |                           |         | UCEC | -0.440 | < 0.001 |
| <i>TBX4</i>      | cg14823851 | CpG island; S_Shelf       | TSS1500 | LUAD | -0.560 | < 0.001 |
| <i>TBX6</i>      | cg14370448 | N_Shelf; S_Shore          | TSS1500 | LIHC | -0.297 | < 0.001 |
|                  |            |                           |         | KIRC | -0.260 | < 0.001 |
| <i>TESC</i>      | cg01409207 | S_Shore                   | TSS1500 | LUAD | -0.315 | < 0.001 |
| <i>TET1</i>      | cg23602092 | N_Shore                   | TSS1500 | KIRC | -0.269 | < 0.001 |
| <i>THOC6</i>     | cg24652919 | S_Shore; N_Shore          | TSS1500 | LIHC | -0.321 | < 0.001 |
| <i>TMC6</i>      | cg24988684 | S_Shore                   | TSS200  | LUAD | -0.275 | < 0.001 |
|                  |            |                           |         | UCEC | -0.404 | < 0.001 |
| <i>TMEM51</i>    | cg22453656 | N_Shore                   | TSS1500 | STAD | -0.258 | < 0.001 |
| <i>TNFRSF10A</i> | cg22843797 | CpG island                | TSS1500 | STAD | -0.271 | < 0.001 |
|                  |            |                           |         | KIRC | -0.274 | < 0.001 |
|                  | cg23882019 | CpG island                | TSS1500 | STAD | -0.258 | < 0.001 |
|                  |            |                           |         | KIRC | -0.282 | < 0.001 |
| <i>TRAF2</i>     | cg21236500 | N_Shore                   | TSS1500 | STAD | -0.323 | < 0.001 |
|                  |            |                           |         | LUAD | -0.466 | < 0.001 |
|                  |            |                           |         | LIHC | -0.530 | < 0.001 |
|                  |            |                           |         | KIRC | -0.326 | < 0.001 |
|                  |            |                           |         | UCEC | -0.311 | < 0.001 |
| <i>TRIM4</i>     | cg02756107 | S_Shore                   | TSS1500 | UCEC | -0.371 | < 0.001 |
|                  | cg25591451 | S_Shore                   | TSS1500 | LUAD | -0.254 | < 0.001 |
|                  |            |                           |         | UCEC | -0.267 | < 0.001 |
| <i>TRPM5</i>     | cg16374193 | S_Shelf                   | TSS1500 | STAD | -0.268 | < 0.001 |
| <i>TSPYL5</i>    | cg22319311 | CpG island                | TSS200  | STAD | -0.688 | < 0.001 |
|                  |            |                           |         | LUAD | -0.526 | < 0.001 |
|                  |            |                           |         | LIHC | -0.351 | < 0.001 |
|                  |            |                           |         | KIRC | -0.472 | < 0.001 |
|                  |            |                           |         | UCEC | -0.733 | < 0.001 |
| <i>TUBA1B</i>    | cg13709639 | S_Shore                   | TSS1500 | LIHC | -0.386 | < 0.001 |
| <i>TUBB</i>      | cg05125809 | N_Shore; N_Shore; S_Shore | TSS1500 | UCEC | -0.282 | < 0.001 |
|                  | cg15677364 | N_Shore; N_Shore; S_Shore | TSS1500 | UCEC | -0.271 | < 0.001 |
| <i>UBE2C</i>     | cg19197419 | CpG island                | TSS200  | LIHC | -0.283 | < 0.001 |
|                  |            |                           |         | UCEC | -0.287 | < 0.001 |
| <i>UBE2V2</i>    | cg25612480 | N_Shore                   | TSS1500 | STAD | -0.339 | < 0.001 |
|                  |            |                           |         | LUAD | -0.400 | < 0.001 |
|                  |            |                           |         | UCEC | -0.329 | < 0.001 |
| <i>USP21</i>     | cg18176482 | N_Shore                   | TSS1500 | STAD | -0.262 | < 0.001 |
|                  |            |                           |         | LIHC | -0.329 | < 0.001 |
|                  |            |                           |         | UCEC | -0.259 | < 0.001 |
|                  | cg01447427 | N_Shore                   | TSS1500 | LIHC | -0.322 | < 0.001 |
|                  | cg17017284 | N_Shore                   | TSS1500 | LIHC | -0.281 | < 0.001 |
| <i>USP44</i>     | cg13879483 | CpG island                | TSS1500 | STAD | -0.475 | < 0.001 |
|                  |            |                           |         | LUAD | -0.358 | < 0.001 |
|                  |            |                           |         | LIHC | -0.329 | < 0.001 |
|                  |            |                           |         | KIRC | -0.365 | < 0.001 |
|                  |            |                           |         | UCEC | -0.387 | < 0.001 |
|                  | cg22802813 | CpG island                | TSS200  | STAD | -0.450 | < 0.001 |
|                  |            |                           |         | LUAD | -0.317 | < 0.001 |
|                  |            |                           |         | LIHC | -0.363 | < 0.001 |
|                  |            |                           |         | KIRC | -0.376 | < 0.001 |
|                  |            |                           |         | UCEC | -0.316 | < 0.001 |
|                  | cg07783282 | CpG island                | TSS1500 | STAD | -0.390 | < 0.001 |
|                  |            |                           |         | LUAD | -0.360 | < 0.001 |
|                  |            |                           |         | LIHC | -0.281 | < 0.001 |
|                  |            |                           |         | KIRC | -0.290 | < 0.001 |
|                  |            |                           |         | UCEC | -0.396 | < 0.001 |
| <i>UTP23</i>     | cg09305680 | N_Shore                   | TSS1500 | STAD | -0.321 | < 0.001 |

|                |            |                     |         |      |        |        |
|----------------|------------|---------------------|---------|------|--------|--------|
|                |            |                     |         | LUAD | -0.350 | <0.001 |
|                |            |                     |         | LIHC | -0.309 | <0.001 |
| <i>VANGL2</i>  | cg13428480 | CpG island          | TSS200  | STAD | -0.557 | <0.001 |
|                |            |                     |         | LUAD | -0.494 | <0.001 |
|                |            |                     |         | LIHC | -0.401 | <0.001 |
|                |            |                     |         | KIRC | -0.388 | <0.001 |
| <i>VIM</i>     | cg10790685 | N_Shore             | TSS1500 | KIRC | -0.462 | <0.001 |
| <i>VWDE</i>    | cg25431479 | S_Shore             | TSS1500 | STAD | -0.273 | <0.001 |
|                |            |                     |         | LUAD | -0.261 | <0.001 |
| <i>WBSCR26</i> | cg17240725 | N_Shelf             | TSS200  | STAD | -0.357 | <0.001 |
|                |            |                     |         | KIRC | -0.295 | <0.001 |
|                |            |                     |         | UCEC | -0.305 | <0.001 |
| <i>WSB2</i>    | cg01932247 | S_Shore             | TSS1500 | LUAD | -0.264 | <0.001 |
|                |            |                     |         | LIHC | -0.312 | <0.001 |
| <i>ZIC1</i>    | cg01227537 | N_Shelf; CpG island | TSS200  | STAD | -0.357 | <0.001 |
|                |            |                     |         | UCEC | -0.373 | <0.001 |
|                | cg14456683 | N_Shelf; CpG island | TSS200  | STAD | -0.347 | <0.001 |
|                |            |                     |         | UCEC | -0.355 | <0.001 |
| <i>ZIC5</i>    | cg00529958 | CpG island          | TSS200  | UCEC | -0.411 | <0.001 |
| <i>ZNF132</i>  | cg11618529 | CpG island          | TSS1500 | STAD | -0.300 | <0.001 |
|                |            |                     |         | KIRC | -0.479 | <0.001 |
|                |            |                     |         | UCEC | -0.497 | <0.001 |
| <i>ZNF14</i>   | cg19714957 | CpG island          | TSS200  | STAD | -0.445 | <0.001 |
|                |            |                     |         | LIHC | -0.506 | <0.001 |
| <i>ZNF154</i>  | cg01268824 | S_Shore             | TSS1500 | STAD | -0.424 | <0.001 |
|                |            |                     |         | LUAD | -0.527 | <0.001 |
|                |            |                     |         | LIHC | -0.285 | <0.001 |
|                |            |                     |         | KIRC | -0.355 | <0.001 |
|                |            |                     |         | UCEC | -0.516 | <0.001 |
|                | cg03234186 | S_Shore             | TSS200  | STAD | -0.423 | <0.001 |
|                |            |                     |         | LUAD | -0.554 | <0.001 |
|                |            |                     |         | LIHC | -0.277 | <0.001 |
|                |            |                     |         | KIRC | -0.370 | <0.001 |
|                |            |                     |         | UCEC | -0.521 | <0.001 |
| <i>ZNF215</i>  | cg04053776 | N_Shore             | TSS1500 | STAD | -0.303 | <0.001 |
|                |            |                     |         | LUAD | -0.338 | <0.001 |
|                |            |                     |         | KIRC | -0.357 | <0.001 |
| <i>ZNF217</i>  | cg09228833 | S_Shore             | TSS200  | UCEC | -0.278 | <0.001 |
|                | cg20979153 | S_Shore             | TSS200  | UCEC | -0.282 | <0.001 |
| <i>ZNF445</i>  | cg18129786 | S_Shore             | TSS1500 | LIHC | -0.282 | <0.001 |
| <i>ZNF512</i>  | cg01464985 | N_Shore             | TSS1500 | UCEC | -0.490 | <0.001 |
| <i>ZNF560</i>  | cg18568589 | S_Shore             | TSS200  | STAD | -0.347 | <0.001 |
|                |            |                     |         | LUAD | -0.480 | <0.001 |
|                |            |                     |         | LIHC | -0.256 | <0.001 |
|                |            |                     |         | UCEC | -0.255 | <0.001 |
|                | cg05221167 | S_Shore             | TSS200  | STAD | -0.316 | <0.001 |
|                |            |                     |         | LUAD | -0.380 | <0.001 |
| <i>ZNF704</i>  | cg12077319 | S_Shore; S_Shore    | TSS200  | STAD | -0.323 | <0.001 |
|                |            |                     |         | LUAD | -0.270 | <0.001 |
| <i>ZNF781</i>  | cg03611452 | CpG island          | TSS200  | STAD | -0.357 | <0.001 |
|                |            |                     |         | LUAD | -0.389 | <0.001 |
|                |            |                     |         | LIHC | -0.391 | <0.001 |
|                |            |                     |         | KIRC | -0.432 | <0.001 |
|                |            |                     |         | UCEC | -0.310 | <0.001 |
| <i>ZSCAN1</i>  | cg25537993 | CpG island          | TSS1500 | STAD | -0.260 | <0.001 |
|                |            |                     |         | LUAD | -0.447 | <0.001 |
|                |            |                     |         | KIRC | -0.345 | <0.001 |
|                |            |                     |         | UCEC | -0.410 | <0.001 |

|                |            |            |        |      |        |         |
|----------------|------------|------------|--------|------|--------|---------|
| <i>ZSCAN18</i> | cg14231297 | CpG island | TSS200 | STAD | -0.475 | < 0.001 |
|                |            |            |        | KIRC | -0.336 | < 0.001 |
|                |            |            |        | UCEC | -0.317 | < 0.001 |

---

<sup>a</sup>Probe ID of the Infinium HumanMethylation 450 BeadChip. <sup>b</sup>N-Shelf: 2000 bp region 5' adjacent to N-Shore; N-Shore: 2000 bp region 5' adjacent to CpG island; S-Shore: 2000 bp region 3' adjacent to CpG island; S-Shelf: 2000 bp region 3' adjacent to S-Shore. <sup>c</sup>TSS200: 200bp upstream of the transcription start site (TSS); TSS1500: from 1500bp upstream of TSS to 200bp upstream of TSS. <sup>d</sup>KIRC: clear cell carcinoma of the kidney; LHC: hepatocellular carcinoma of the liver; LUAD: adenocarcinoma of the lung; STAD: adenocarcinoma of the stomach; UCEC: endometrial carcinoma of the uterine corpus.

**Supplementary Table S5** Correlations between the levels of mRNA expression and DNA methylation in the normal control liver tissue (C) samples (n=31 and n=36 for mRNA expression and DNA methylation quantification, respectively), non-cancerous liver tissue samples (N) (n=22) obtained from patients with non-alcoholic steatohepatitis-related hepatocellular carcinomas, and the corresponding cancerous tissue samples (T) (n=22).

| Gene           | Probe ID <sup>a</sup> | Chromosome | Position <sup>b</sup> | C (n=36)                                                |                                                 |                                   |                       | N (n=22)                                         |                                          |                             |                | T (n=22)                                         |                                          |                             |                |
|----------------|-----------------------|------------|-----------------------|---------------------------------------------------------|-------------------------------------------------|-----------------------------------|-----------------------|--------------------------------------------------|------------------------------------------|-----------------------------|----------------|--------------------------------------------------|------------------------------------------|-----------------------------|----------------|
|                |                       |            |                       | Average mRNA expression levels (/GAPDH, mean±SD) (n=31) | Average DNA methylation levels (mean±SD) (n=36) | Correlation coefficient (r, n=31) | P <sup>c</sup> (n=31) | Average mRNA expression levels (/GAPDH, mean±SD) | Average DNA methylation levels (mean±SD) | Correlation coefficient (r) | P <sup>c</sup> | Average mRNA expression levels (/GAPDH, mean±SD) | Average DNA methylation levels (mean±SD) | Correlation coefficient (r) | P <sup>c</sup> |
| <i>DCAF4L2</i> | cg02310286            | 8          | 88886432              | 0.009±0.016                                             | 0.884±0.021                                     | 0.183                             | 0.402                 | 0.001±0.000                                      | 0.840±0.116                              | -0.043                      | 0.850          | 0.331±0.546                                      | 0.387±0.251                              | -0.536                      | <u>0.010</u>   |
|                | cg17703554            | 8          | 88886339              |                                                         | 0.805±0.023                                     | 0.017                             | 0.939                 | 0.789±0.090                                      | -0.002                                   | 0.992                       | 0.374±0.188    | -0.435                                           | <u>0.043</u>                             |                             |                |
|                | cg21181391            | 8          | 88886411              |                                                         | 0.808±0.030                                     | 0.082                             | 0.710                 | 0.787±0.134                                      | 0.044                                    | 0.844                       | 0.369±0.201    | -0.497                                           | <u>0.019</u>                             |                             |                |
| <i>CKLF</i>    | cg08287306            | 16         | 66585924              | 0.525±0.485                                             | 0.374±0.041                                     | -0.065                            | 0.730                 | 0.328±0.097                                      | 0.308±0.061                              | 0.088                       | 0.696          | 0.984±0.686                                      | 0.163±0.064                              | -0.238                      | 0.286          |
|                | cg08793208            | 16         | 66585449              |                                                         | 0.504±0.055                                     | -0.098                            | 0.600                 | 0.406±0.065                                      | -0.018                                   | 0.935                       | 0.243±0.108    | 0.0290                                           | 0.898                                    |                             |                |
| <i>TRIM4</i>   | cg02756107            | 7          | 99517460              | 0.845±0.578                                             | 0.492±0.068                                     | 0.123                             | 0.509                 | 0.815±0.254                                      | 0.472±0.047                              | 0.150                       | 0.505          | 2.010±1.642                                      | 0.233±0.119                              | -0.562                      | <u>0.006</u>   |
|                | cg25591451            | 7          | 99517509              |                                                         | 0.513±0.069                                     | 0.101                             | 0.590                 | 0.469±0.078                                      | 0.331                                    | 0.133                       | 0.206±0.118    | -0.675                                           | <u>≤ 0.001</u>                           |                             |                |
| <i>PRCI</i>    | cg01407062            | 15         | 91538575              | 0.014±0.013                                             | 0.684±0.050                                     | -0.081                            | 0.666                 | 0.023±0.021                                      | 0.589±0.055                              | 0.047                       | 0.027          | 0.161±0.200                                      | 0.253±0.140                              | -0.083                      | 0.715          |
| <i>UBE2C</i>   | cg19197419            | 20         | 44441612              | 0.210±0.414                                             | 0.369±0.050                                     | 0.019                             | 0.921                 | 0.093±0.124                                      | 0.296±0.056                              | 0.215                       | 0.337          | 0.753±0.780                                      | 0.130±0.122                              | -0.019                      | 0.934          |
| <i>TUBA1B</i>  | cg13709639            | 12         | 49526040              | 0.011±0.011                                             | 0.628±0.051                                     | -0.208                            | 0.261                 | 0.016±0.0061                                     | 0.513±0.080                              | 0.185                       | 0.411          | 0.023±0.017                                      | 0.222±0.139                              | -0.171                      | 0.448          |

<sup>a</sup>Probe+AS-R14 ID for the Infinium HumanMethylation450 BeadChip (Illumina).

<sup>b</sup>National Center for Biotechnology Information database (Genome Build 37).

<sup>c</sup>P-values of less than 0.05 were considered statistically significant and underlined when r was less than -0.3.

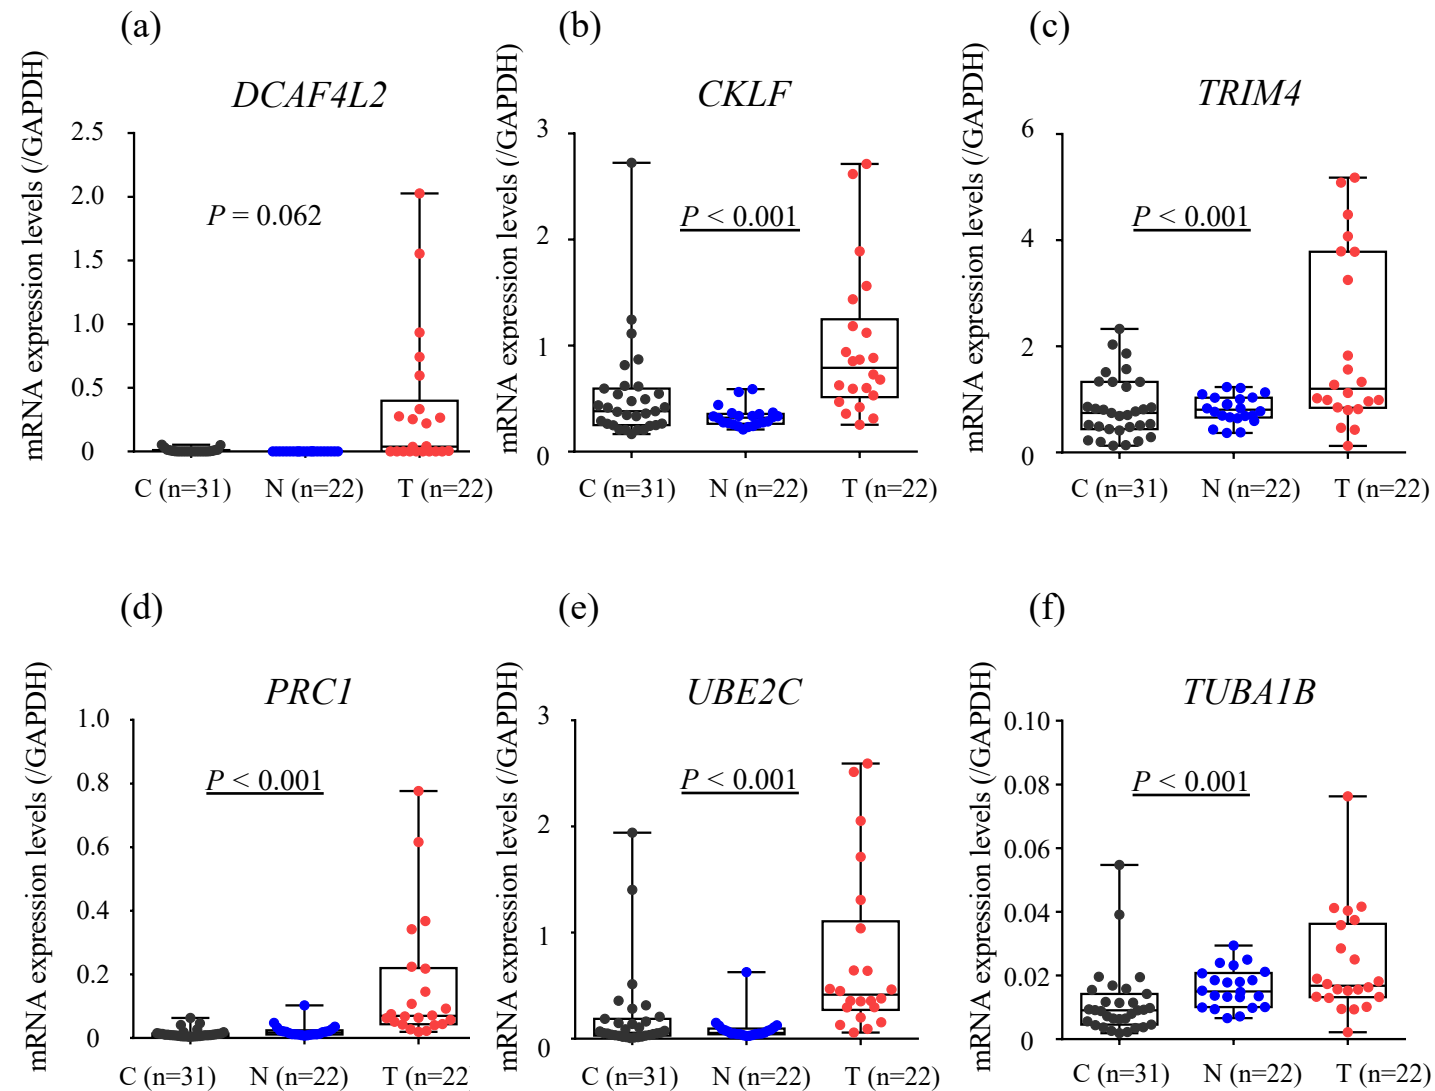

**Supplementary Figure S1** Ordered differences in levels of mRNA expression for the *DCAF4L2* (a), *CKLF* (b), *TRIM4* (c), *PRC1* (d), *UBE2C* (e) and *TUBA1B* (f) genes in normal control liver tissue (C) (n=31) and non-cancerous liver tissue (N) (n=22) obtained from patients with non-alcoholic steatohepatitis-related hepatocellular carcinomas relative to the corresponding tumorous tissue (T) samples (n=22). P values by Jonckheere-Terpstra trend test are shown in each panel. P values of < 0.05 are underlined.

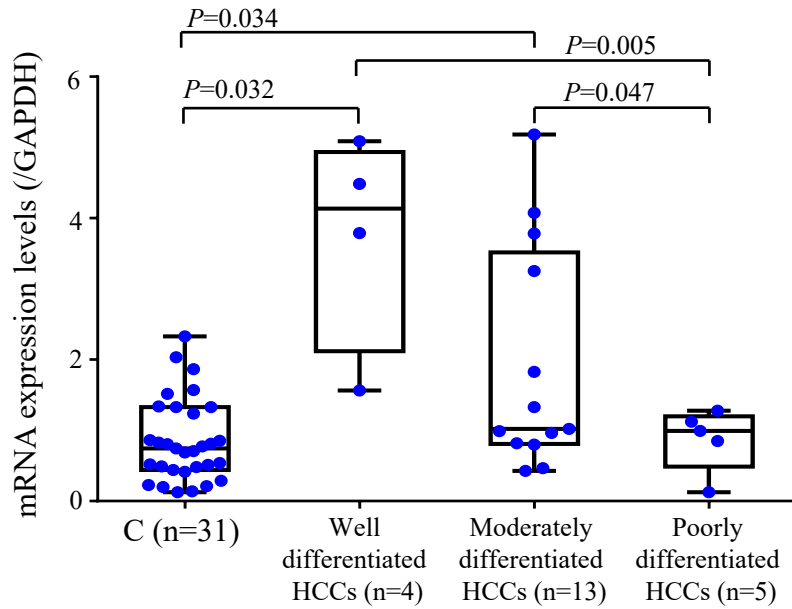

**Supplementary Figure S2** Levels of mRNA expression for the *TRIM4* gene in samples of normal control liver tissue (C) (n=31) and tumorous tissue (T) (n=22). T samples were grouped on the basis of tumor differentiation. mRNA expression initially increased during the establishment of cancer, and thereafter decreased during the process of dedifferentiation from well to poorly differentiated HCC.

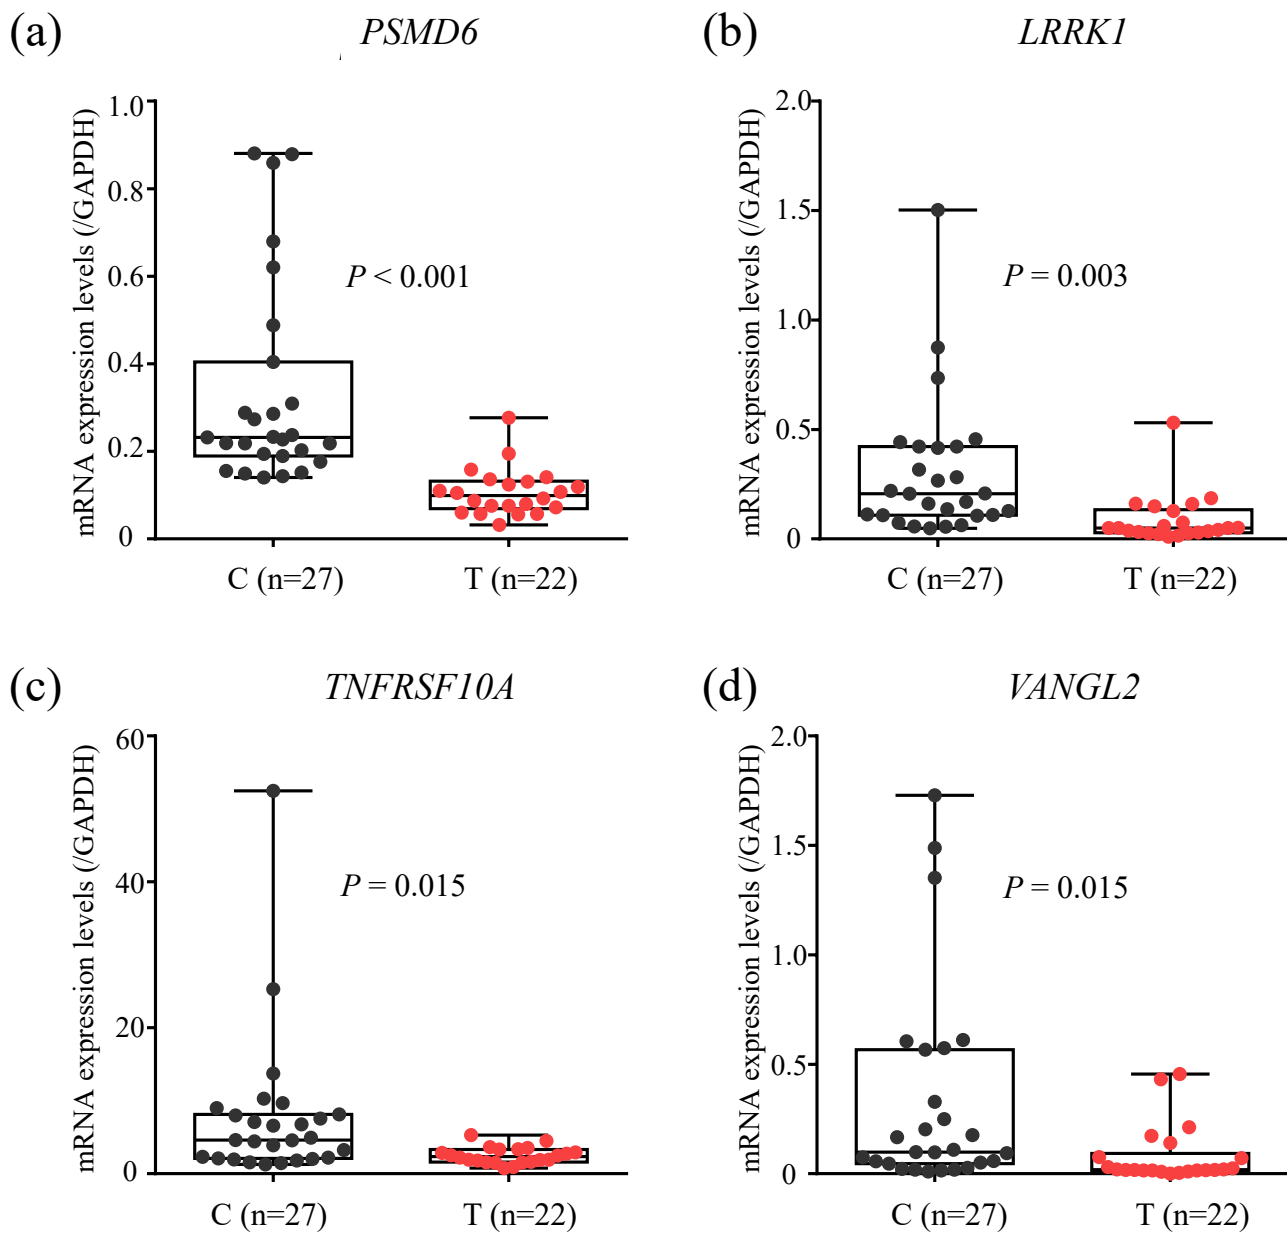

**Supplementary Figure S3** Levels of mRNA expression for the representative genes involved in the NF- $\kappa$ B signaling and/or Wnt signaling pathways shown in Table 1, i.e. *PSMD6* (a), *LRRK1* (b), *TNFRSF10A* (c) and *VANGL2* (d), in samples of normal control liver tissue (C) and tumorous tissue (T).  $P$  values by Welch's t test are shown in each panel. Levels of mRNA expression for all 4 genes were significantly decreased in T samples (n=22) relative to C samples (n=27).
